# Supplementary material
Source: PubMed Central journal article supplement (PMC2401338)
Supplement: M700433-MCP200_1.pdf [file M700433-MCP200_1.pdf]

**Supplemental TABLE I.**

**Summary of decreased and increased protein spots in *R. capsulatus* DsbA-null mutant and revertant compared to the wild-type strain MT1131**

Micromass Protein-Lynx Global Server (Version 2.0, Waters/Micromass) search parameters for peptide mass fingerprint (PMF): database, *R. capsulatus* (Integrated Genomics Inc., Chicago, USA); enzyme, trypsin; miss cleavage sites, 1; no fixed or variable modification was applied; mass accuracy, 40 ppm; instrument type, MALDI-TOF-MS. SEQUEST (Version 3.1) search parameters for available MS/MS data: same database and enzyme with the PMF data analysis; the number of maximal internal (missed) cleavage sites, 2; mass tolerance for precursor ion, 2.5; mass tolerance for fragment ion, 1.0; no modification was considered. Matching peptides were filtered according to correlation scores ( $X_{\text{corr}}$  at least 1.5, 2.0 and 3.0 for 1+, 2+ and 3+ charged peptides, respectively) to give high confidence of protein identification; instrument type, nLC-ESI-MS/MS. Experimental Mr and the pI's were calculated using PDQuest 2D-gel analysis software (Version 7.2-Bio-Rad)

| ORF #                     | Protein Name                                      | SSP# <sup>a</sup> | Gene Name   | Cys <sup>b</sup> | PDQuest     |      |              |      |                   |        |                     |        | [Score | Cov% | NMP] <sup>d</sup> | z    | $\Delta M$              | $X_{\text{corr}}$ <sup>e</sup> | Peptide MS sequence |
|---------------------------|---------------------------------------------------|-------------------|-------------|------------------|-------------|------|--------------|------|-------------------|--------|---------------------|--------|--------|------|-------------------|------|-------------------------|--------------------------------|---------------------|
|                           |                                                   |                   |             |                  | Theoretical |      | Experimental |      | MD20 <sup>c</sup> |        | MD20R3 <sup>c</sup> |        |        |      |                   |      |                         |                                |                     |
|                           |                                                   |                   |             |                  | Mr          | pI   | Mr           | pI   | MT1131            | MT1131 | MT1131              | MT1131 |        |      |                   |      |                         |                                |                     |
| <b>DECREASED PROTEINS</b> |                                                   |                   |             |                  |             |      |              |      |                   |        |                     |        |        |      |                   |      |                         |                                |                     |
| RRC00091                  | Spermidine/Putrescine-Binding Periplasmic Protein | 1402              | <i>potD</i> | 2                | 38.43       | 4.60 | 40.26        | 4.41 | 0.18              | 0.17   | 8.2                 | 42.6   | 13     |      |                   |      |                         |                                |                     |
|                           |                                                   |                   |             |                  |             |      |              |      |                   |        |                     |        |        | 2    | 0.4               | 4.85 | (K) YGDAPTYSFYGDDDEAYQK |                                |                     |
|                           |                                                   |                   |             |                  |             |      |              |      |                   |        |                     |        |        | 2    | 0.4               | 3.91 | (R) ALLDNIGYGHSSLK      |                                |                     |
|                           |                                                   |                   |             |                  |             |      |              |      |                   |        |                     |        |        | 2    | 0.2               | 3.86 | (R) DAGLIEPWPAK         |                                |                     |
|                           |                                                   |                   |             |                  |             |      |              |      |                   |        |                     |        |        | 3    | -1.0              | 3.67 | (K) APILPQVPNDPQQR      |                                |                     |
|                           |                                                   |                   |             |                  |             |      |              |      |                   |        |                     |        |        | 2    | 0.2               | 3.46 | (K) APILPQVPNDPQQR      |                                |                     |
|                           |                                                   |                   |             |                  |             |      |              |      |                   |        |                     |        |        | 1    | 0.2               | 2.94 | (R) DAGLIEPWPAK         |                                |                     |
|                           |                                                   |                   |             |                  |             |      |              |      |                   |        |                     |        |        | 3    | -1.1              | 2.88 | (R) ALLDNIGYGHSSLK      |                                |                     |
|                           |                                                   |                   |             |                  |             |      |              |      |                   |        |                     |        |        | 2    | 0.0               | 2.80 | (R) NENYPVAFQR          |                                |                     |
|                           |                                                   |                   |             |                  |             |      |              |      |                   |        |                     |        |        | 2    | 0.1               | 2.29 | (K) YLDSPIFK            |                                |                     |
|                           |                                                   |                   |             |                  |             |      |              |      |                   |        |                     |        |        | 1    | 0.0               | 2.26 | (K) YLDSPIFK            |                                |                     |
|                           |                                                   |                   |             |                  |             |      |              |      |                   |        |                     |        |        | 2    | -1.0              | 2.26 | (K) YLDSPIFKDDK         |                                |                     |
| RRC00677                  | Sorbitol-Binding Periplasmic Protein              | 2502              |             | 3                | 47.76       | 4.85 | 46.74        | 4.55 | 0.13              | 0.14   |                     |        |        | 2    | 0.3               | 4.98 | (K) VEWVTLEENVLR        |                                |                     |
|                           |                                                   |                   |             |                  |             |      |              |      |                   |        |                     |        |        | 2    | 0.4               | 3.63 | (R) TSLYENPEYQK         |                                |                     |
|                           |                                                   |                   |             |                  |             |      |              |      |                   |        |                     |        |        | 2    | 0.5               | 2.87 | (K) DYTALVASK           |                                |                     |
|                           |                                                   |                   |             |                  |             |      |              |      |                   |        |                     |        |        | 1    | -0.5              | 2.84 | (K) VEWVTLEENVLR        |                                |                     |
|                           |                                                   |                   |             |                  |             |      |              |      |                   |        |                     |        |        | 1    | -1.0              | 2.80 | (K) PQFDGEAWK           |                                |                     |
|                           |                                                   |                   |             |                  |             |      |              |      |                   |        |                     |        |        | 1    | -0.5              | 2.57 | (R) TSLYENPEYQK         |                                |                     |
|                           |                                                   |                   |             |                  |             |      |              |      |                   |        |                     |        |        | 1    | -0.3              | 2.16 | (K) FVEWATSK            |                                |                     |
| RRC00677                  | Sorbitol-Binding Periplasmic Protein              | 2503              |             | 3                | 47.76       | 4.85 | 46.74        | 4.56 | 0.12              | 0.13   |                     |        |        | 2    | -0.6              | 3.56 | (K) AGLTMPAEPTWDDVK     |                                |                     |
|                           |                                                   |                   |             |                  |             |      |              |      |                   |        |                     |        |        | 2    | 0.7               | 3.38 | (R) TSLYENPEYQK         |                                |                     |

|          |                                           |      |             |   |       |      |       |      |      |      |     |      |    |      |      |     |                        |
|----------|-------------------------------------------|------|-------------|---|-------|------|-------|------|------|------|-----|------|----|------|------|-----|------------------------|
|          |                                           |      |             |   |       |      |       |      |      |      |     |      | 1  | -0.8 | 2.69 | (K) | VEWVTLLEENVLR          |
|          |                                           |      |             |   |       |      |       |      |      |      |     |      | 1  | -0.3 | 2.65 | (R) | TSLYENPEYQK            |
|          |                                           |      |             |   |       |      |       |      |      |      |     |      | 2  | 0.7  | 2.41 | (K) | EGWANVPPGTR            |
|          |                                           |      |             |   |       |      |       |      |      |      |     |      | 1  | 0.0  | 2.18 | (K) | FVEWATSK               |
|          |                                           |      |             |   |       |      |       |      |      |      |     |      | 2  | 0.3  | 2.14 | (K) | FVEWATSK               |
| RRC00724 | D-Xylose Binding Periplasmic Protein      | 1301 | <i>xyfF</i> | 2 | 35.03 | 4.29 | 36.88 | 4.38 | 0.61 | 0.51 | 8.2 | 29.2 | 8  |      |      |     |                        |
|          |                                           |      |             |   |       |      |       |      |      |      |     |      | 2  | 0.2  | 4.58 | (K) | SVAGATEWTSPAGTK        |
|          |                                           |      |             |   |       |      |       |      |      |      |     |      | 2  | -0.5 | 3.95 | (K) | IVGEAYTDGWLPAQAQR      |
|          |                                           |      |             |   |       |      |       |      |      |      |     |      | 3  | -1.4 | 3.61 | (R) | GGQQEVLQAAIDAGDIK      |
|          |                                           |      |             |   |       |      |       |      |      |      |     |      | 2  | -1.9 | 3.26 | (R) | VALGTQTVSVWK           |
|          |                                           |      |             |   |       |      |       |      |      |      |     |      | 2  | 0.0  | 3.25 | (R) | GGQQEVLQAAIDAGDIK      |
|          |                                           |      |             |   |       |      |       |      |      |      |     |      | 1  | 0.2  | 3.24 | (K) | SVAGATEWTSPAGTK        |
| RRC00775 | Lysine-Arginine-Ornithine-Binding Protein | 101  | <i>argT</i> | 2 | 25.18 | 5.10 | 27.63 | 4.26 | 0.27 | 0.23 |     |      | 2  | 0.6  | 5.25 | (R) | KQTIDFSDNYNPPAASAYVATK |
|          |                                           |      |             |   |       |      |       |      |      |      |     |      | 2  | -0.4 | 4.04 | (K) | GVVAAQVGTIQADYVAK      |
|          |                                           |      |             |   |       |      |       |      |      |      |     |      | 2  | -0.7 | 2.76 | (K) | NGEADAVFADK            |
|          |                                           |      |             |   |       |      |       |      |      |      |     |      | 2  | -0.2 | 2.68 | (K) | ADGSLNAMIK             |
|          |                                           |      |             |   |       |      |       |      |      |      |     |      | 1  | 0.7  | 2.46 | (K) | KWFGDDAPVF             |
|          |                                           |      |             |   |       |      |       |      |      |      |     |      | 1  | -0.6 | 2.27 | (K) | NGEADAVFADK            |
|          |                                           |      |             |   |       |      |       |      |      |      |     |      | 2  | 0.2  | 2.18 | (K) | WFGDDAPVF              |
|          |                                           |      |             |   |       |      |       |      |      |      |     |      | 1  | -0.6 | 1.83 | (K) | WFGDDAPVF              |
| RRC00804 | Acriflavin Resistance Protein E           | 9202 | <i>acrA</i> | 1 | 36.36 | 8.55 | 36.60 | 5.94 | 0.61 | 0.01 |     |      | 2  | 0.3  | 3.83 | (R) | GVAPLATLEAAAAK         |
|          |                                           |      |             |   |       |      |       |      |      |      |     |      | 2  | 0.2  | 3.30 | (R) | EAVIDVPDDLRL           |
|          |                                           |      |             |   |       |      |       |      |      |      |     |      | 2  | -0.1 | 3.10 | (R) | PAEAVPVTLGQR           |
|          |                                           |      |             |   |       |      |       |      |      |      |     |      | 2  | 0.2  | 1.90 | (R) | SVTPGQQLGPR            |
| RRC00984 | ABC Transporter Substrate-Binding Protein | 2401 |             | 2 | 35.20 | 4.70 | 41.75 | 4.55 | 0.23 | 0.21 | 8.1 | 57.5 | 13 |      |      |     |                        |
|          |                                           |      |             |   |       |      |       |      |      |      |     |      | 2  | 0.2  | 5.50 | (K) | APEGAYTLEITNEALK       |
|          |                                           |      |             |   |       |      |       |      |      |      |     |      | 2  | 0.3  | 5.10 | (R) | TVATLMGGGSDPVITK       |
|          |                                           |      |             |   |       |      |       |      |      |      |     |      | 2  | 0.3  | 4.86 | (K) | LTAGSNGALDVADYER       |
|          |                                           |      |             |   |       |      |       |      |      |      |     |      | 3  | -1.0 | 3.92 | (K) | APEGAYTLEITNEALK       |
|          |                                           |      |             |   |       |      |       |      |      |      |     |      | 2  | 0.3  | 3.75 | (K) | LGIPTTGGADGVEVLK       |
|          |                                           |      |             |   |       |      |       |      |      |      |     |      | 2  | 0.2  | 3.56 | (K) | QGFNVDPLLQK            |
|          |                                           |      |             |   |       |      |       |      |      |      |     |      | 1  | 0.2  | 2.63 | (K) | LVNIAQPFK              |
| RRC01044 | Iron(III)-Binding Periplasmic Protein     | 5302 |             | 2 | 35.50 | 5.24 | 38.00 | 5.35 | 0.20 | 0.23 | 8.1 | 38.0 | 9  |      |      |     |                        |
|          |                                           |      |             |   |       |      |       |      |      |      |     |      | 2  | 0.0  | 4.60 | (K) | LLEYLTSDAAQK           |
|          |                                           |      |             |   |       |      |       |      |      |      |     |      | 3  | -0.9 | 3.41 | (K) | DGGTHVNISGAAIAK        |

|          |                                                   |      |             |       |       |       |       |      |      |      |      |      |    |      |      |                            |
|----------|---------------------------------------------------|------|-------------|-------|-------|-------|-------|------|------|------|------|------|----|------|------|----------------------------|
|          |                                                   |      |             |       |       |       |       |      |      |      |      |      | 2  | 0.3  | 3.37 | (K) DGGTHVNISGAAIAK        |
|          |                                                   |      |             |       |       |       |       |      |      |      |      |      | 1  | -0.3 | 2.48 | (K) LYAEANFEYPPVK          |
| RRC01044 | Iron(III)-Binding Periplasmic Protein             | 6302 | 2           | 35.50 | 5.24  | 37.85 | 5.43  | 0.18 | 0.22 | 8.2  | 23.3 | 6    |    |      |      |                            |
|          |                                                   |      |             |       |       |       |       |      |      |      |      |      | 1  | -0.5 | 3.72 | (K) DGGTHVNISGAAIAK        |
|          |                                                   |      |             |       |       |       |       |      |      |      |      |      | 2  | 0.3  | 3.36 | (K) LYAEANFEYPPVK          |
|          |                                                   |      |             |       |       |       |       |      |      |      |      |      | 1  | 0.4  | 3.06 | (K) LLEYLTSDAQK            |
| RRC01089 | 5'-Nucleotidase Precursor (EC 3.1.3.5)            | 3602 | <i>yunD</i> | 4     | 54.37 | 4.59  | 54.5  | 4.61 | 0.67 | 0.57 |      |      | 2  | 0.4  | 5.68 | (K) SAGGEPILLDASVTPDAAVAAR |
|          |                                                   |      |             |       |       |       |       |      |      |      |      |      | 2  | 0.3  | 2.98 | (K) VQFPLVSGNLDLSR         |
|          |                                                   |      |             |       |       |       |       |      |      |      |      |      | 2  | 0.1  | 2.56 | (R) FPQVAGLR               |
|          |                                                   |      |             |       |       |       |       |      |      |      |      |      | 2  | 1.4  | 2.32 | (K) ADVQALTDQGVTK          |
|          |                                                   |      |             |       |       |       |       |      |      |      |      |      | 1  | 0.0  | 2.03 | (R) FPQVAGLR               |
| RRC01127 | D-Ribose Binding Periplasmic Protein              | 102  | <i>rbsB</i> | 1     | 32.94 | 4.38  | 32.38 | 4.32 | 0.00 | 0.00 | 8.2  | 57.5 | 14 |      |      |                            |
|          |                                                   |      |             |       |       |       |       |      |      |      |      |      | 2  | 0.6  | 4.76 | (K) AILDNAGADATVAAVQK      |
|          |                                                   |      |             |       |       |       |       |      |      |      |      |      | 2  | 0.5  | 4.10 | (R) SQGYHDIIDQYPDLK        |
|          |                                                   |      |             |       |       |       |       |      |      |      |      |      | 2  | 0.4  | 4.07 | (K) QSELFDSAIAAGVK         |
|          |                                                   |      |             |       |       |       |       |      |      |      |      |      | 2  | 0.5  | 4.07 | (R) TDVVVVGFDGSNDVR        |
|          |                                                   |      |             |       |       |       |       |      |      |      |      |      | 3  | -1.3 | 3.24 | (R) SQGYHDIIDQYPDLK        |
|          |                                                   |      |             |       |       |       |       |      |      |      |      |      | 2  | 0.5  | 3.09 | (K) ATVLQPAYAQAQMAVEQADK   |
|          |                                                   |      |             |       |       |       |       |      |      |      |      |      | 2  | 0.2  | 2.90 | (K) GDYAELLGK              |
|          |                                                   |      |             |       |       |       |       |      |      |      |      |      | 1  | -0.4 | 2.27 | (K) GDYAELLGK              |
| RRC01127 | D-Ribose Binding Periplasmic Protein              | 1102 |             | 1     | 32.94 | 4.38  | 30.45 | 4.36 | 0.38 | 0.28 | 8.2  | 54.0 | 11 |      |      |                            |
|          |                                                   |      |             |       |       |       |       |      |      |      |      |      | 2  | 0.3  | 5.32 | (R) SQGYHDIIDQYPDLK        |
|          |                                                   |      |             |       |       |       |       |      |      |      |      |      | 2  | 0.4  | 4.30 | (R) TDVVVVGFDGSNDVR        |
|          |                                                   |      |             |       |       |       |       |      |      |      |      |      | 2  | -0.7 | 2.60 | (K) GDYAELLGK              |
|          |                                                   |      |             |       |       |       |       |      |      |      |      |      | 1  | -0.2 | 2.16 | (K) GDYAELLGK              |
| RRC01245 | Spermidine/Putrescine-Binding Periplasmic Protein | 1302 |             | 2     | 37.56 | 4.49  | 38.31 | 4.48 | 0.01 | 0.01 | 8.1  | 31.0 | 9  |      |      |                            |
|          |                                                   |      |             |       |       |       |       |      |      |      |      |      | 2  | 0.3  | 4.83 | (K) VTITDFDSNDTALAK        |
|          |                                                   |      |             |       |       |       |       |      |      |      |      |      | 2  | 0.2  | 3.43 | (R) LGNPDVAYGYPK           |
|          |                                                   |      |             |       |       |       |       |      |      |      |      |      | 2  | -1.9 | 3.29 | (R) YANGIAGSEAFLEPMK       |
|          |                                                   |      |             |       |       |       |       |      |      |      |      |      | 2  | 0.2  | 3.11 | (K) WLSMDYSTVEK            |
|          |                                                   |      |             |       |       |       |       |      |      |      |      |      | 3  | -0.8 | 2.80 | (K) ALDYQNAIWTELQK         |
|          |                                                   |      |             |       |       |       |       |      |      |      |      |      | 2  | -1.2 | 2.52 | (K) TAPELTPPAEFADK         |
| RRC01245 | Spermidine/Putrescine-Binding Periplasmic Protein | 2301 |             | 2     | 37.56 | 4.49  | 38.33 | 4.52 | 0.24 | 0.26 | 8.2  | 23.7 | 9  |      |      |                            |
|          |                                                   |      |             |       |       |       |       |      |      |      |      |      | 2  | -0.7 | 3.61 | (K) ALDYQNAIWTELQK         |

|          |                                                 |      |             |   |       |      |       |      |      |      |     |      |    |      |      |      |                     |                      |
|----------|-------------------------------------------------|------|-------------|---|-------|------|-------|------|------|------|-----|------|----|------|------|------|---------------------|----------------------|
|          |                                                 |      |             |   |       |      |       |      |      |      |     |      | 2  | -1.7 | 1.79 | (K)  | VTITDFDSNDTALAK     |                      |
|          |                                                 |      |             |   |       |      |       |      |      |      |     |      | 1  | -2.4 | 2.57 | (R)  | LGNPDVAYGYPK        |                      |
|          |                                                 |      |             |   |       |      |       |      |      |      |     |      | 1  | 0.1  | 1.82 | (K)  | VRDTLLAAKPK         |                      |
| RRC01333 | Periplasmic Oligopeptide-Binding Protein (OppA) | 2702 | <i>oppA</i> | 2 | 57.80 | 4.50 | 57.11 | 4.55 | 0.37 | 0.01 |     |      | 2  | 0.1  | 3.20 | (R)  | HGYTEANPLK          |                      |
|          |                                                 |      |             |   |       |      |       |      |      |      |     |      | 2  | 0.0  | 3.09 | (K)  | APWSELEIR           |                      |
|          |                                                 |      |             |   |       |      |       |      |      |      |     |      | 2  | -1.3 | 2.50 | (R)  | VNFYPTEDATAAVR      |                      |
|          |                                                 |      |             |   |       |      |       |      |      |      |     |      | 1  | 0.0  | 2.23 | (R)  | AAWFADYK            |                      |
|          |                                                 |      |             |   |       |      |       |      |      |      |     |      | 1  | 0.0  | 1.91 | (K)  | APWSELEIR           |                      |
|          |                                                 |      |             |   |       |      |       |      |      |      |     |      | 1  | -0.9 | 1.79 | (K)  | IGPTLATYYYGFK       |                      |
|          |                                                 |      |             |   |       |      |       |      |      |      |     |      | 1  | 0.1  | 1.57 | (R)  | AVDATTLEVTLK        |                      |
| RRC02708 | ABC Transporter Substrate-Binding Protein       | 1504 | <i>motA</i> | 2 | 41.97 | 4.84 | 46.71 | 4.51 | 0.00 | 0.00 |     |      | 2  | 0.4  | 5.15 | (K)  | SPIWTDPTFWADHDTLNEK |                      |
|          |                                                 |      |             |   |       |      |       |      |      |      |     |      | 2  | 0.6  | 3.92 | (K)  | SSNALVGLYQDGK       |                      |
|          |                                                 |      |             |   |       |      |       |      |      |      |     |      | 2  | 0.2  | 3.66 | (R)  | FFAAEVAEGK          |                      |
|          |                                                 |      |             |   |       |      |       |      |      |      |     |      | 2  | 0.3  | 2.97 | (K)  | FLAFSTDTQR          |                      |
|          |                                                 |      |             |   |       |      |       |      |      |      |     |      | 1  | 1.0  | 2.80 | (K)  | SSNALVGLYQDGK       |                      |
|          |                                                 |      |             |   |       |      |       |      |      |      |     |      | 1  | 0.2  | 2.76 | (R)  | FFAAEVAEGK          |                      |
| RRC02708 | ABC Transporter Substrate-Binding Protein       | 1502 |             | 2 | 41.97 | 4.84 | 46.72 | 4.40 | 0.44 | 0.52 |     |      | 2  | 0.4  | 4.37 | (K)  | SPIWTDPTFWADHDTLNEK |                      |
|          |                                                 |      |             |   |       |      |       |      |      |      |     |      | 2  | -0.8 | 3.87 | (R)  | KSSNALVGLYQDGK      |                      |
|          |                                                 |      |             |   |       |      |       |      |      |      |     |      | 2  | 0.1  | 3.63 | (R)  | FFAAEVAEGK          |                      |
|          |                                                 |      |             |   |       |      |       |      |      |      |     |      | 2  | 0.2  | 3.39 | (K)  | FLAFSTDTQR          |                      |
|          |                                                 |      |             |   |       |      |       |      |      |      |     |      | 1  | 0.2  | 3.02 | (R)  | FFAAEVAEGK          |                      |
| RRC02708 | ABC Transporter Substrate-Binding Protein       | 1603 |             | 2 | 41.97 | 4.84 | 46.78 | 4.41 | 0.69 | 0.64 |     |      | 2  | 0.1  | 4.48 | (K)  | INSIDADNPATPLK      |                      |
|          |                                                 |      |             |   |       |      |       |      |      |      |     |      | 1  | 0.1  | 2.54 | (R)  | FFAAEVAEGK          |                      |
|          |                                                 |      |             |   |       |      |       |      |      |      |     |      | 2  | -0.1 | 2.02 | (K)  | SSNALVGLYQDGK       |                      |
|          |                                                 |      |             |   |       |      |       |      |      |      |     |      | 2  | -0.4 | 1.94 | (K)  | FLAFSTDTQR          |                      |
| RRC02807 | Oligopeptide-Binding Protein OppA               | 3802 | <i>appA</i> | 8 | 61.57 | 4.53 | 61.31 | 4.56 | 0.34 | 0.27 | 8.2 | 33.7 | 19 |      |      |      |                     |                      |
|          |                                                 |      |             |   |       |      |       |      |      |      |     |      |    | 2    | 0.4  | 3.88 | (K)                 | LLDEAGWTDTDGDGIR     |
|          |                                                 |      |             |   |       |      |       |      |      |      |     |      |    | 2    | 0.2  | 3.83 | (K)                 | TNDVAVFEANPHYR       |
|          |                                                 |      |             |   |       |      |       |      |      |      |     |      |    | 3    | -1.0 | 3.31 | (K)                 | TNDVAVFEANPHYR       |
|          |                                                 |      |             |   |       |      |       |      |      |      |     |      |    | 2    | 0.0  | 3.16 | (K)                 | QIDPSVFFGGDAGSPDTFQK |
|          |                                                 |      |             |   |       |      |       |      |      |      |     |      |    | 2    | 0.3  | 2.92 | (K)                 | IEAVDPLTVK           |
|          |                                                 |      |             |   |       |      |       |      |      |      |     |      |    | 2    | 0.3  | 2.13 | (R)                 | QALSMADR             |
|          |                                                 |      |             |   |       |      |       |      |      |      |     |      |    | 2    | -0.7 | 2.05 | (K)                 | EMLTTADAGAR          |
|          |                                                 |      |             |   |       |      |       |      |      |      |     |      |    | 3    | -0.8 | 2.05 | (K)                 | APKPEDQWQGENIPR      |
|          |                                                 |      |             |   |       |      |       |      |      |      |     |      |    | 2    | -0.8 | 1.71 | (R)                 | LAAEIPTLENGGVSADGK   |

|          |                                          |      |             |       |       |       |       |      |      |      |      |      |    |      |      |                         |                         |
|----------|------------------------------------------|------|-------------|-------|-------|-------|-------|------|------|------|------|------|----|------|------|-------------------------|-------------------------|
|          |                                          |      |             |       |       |       |       |      |      |      |      |      | 1  | -0.6 | 1.58 | (K) IEAVDPLTVK          |                         |
| RRC02807 | Oligopeptide-Binding Protein OppA        | 2703 | 8           | 61.57 | 4.53  | 60.46 | 4.55  | 0.37 | 0.33 | 8.2  | 15.2 | 9    | 2  | 0.3  | 3.85 | (K) TNPYSAFVFGALAPILQK  |                         |
|          |                                          |      |             |       |       |       |       |      |      |      |      |      | 2  | 0.2  | 3.58 | (K) TNDVAVFEANPHYR      |                         |
|          |                                          |      |             |       |       |       |       |      |      |      |      |      | 1  | 0.0  | 1.77 | (K) IEAVDPLTVK          |                         |
| RRC02811 | Glutathione Peroxidase (EC 1.11.1.9)     | 5002 | 2           | 19.41 | 5.90  | 19.56 | 5.36  | 0.05 | 0.00 | 8.0  | 30.1 | 5    |    |      |      | PMF SPECTRUM*           |                         |
|          |                                          |      |             |       |       |       |       |      |      |      |      |      | 2  | 0.6  | 3.51 | (K) GLIVLAVPSDDFK*      |                         |
|          |                                          |      |             |       |       |       |       |      |      |      |      |      | 1  | 1.2  | 2.09 | (R) AAFEPLLPGA*         |                         |
| RRC02879 | Periplasmic Component of Efflux System   | 5404 | 1           | 34.68 | 5.04  | 39.90 | 5.36  | 0.00 | 0.00 | 8.2  | 35.3 | 9    | 2  | -0.4 | 5.79 | (K) LLAAEAAVLQAEAAK     |                         |
|          |                                          |      |             |       |       |       |       |      |      |      |      |      | 2  | -0.6 | 5.78 | (R) AQVQNATALIAAAEASR   |                         |
|          |                                          |      |             |       |       |       |       |      |      |      |      |      | 3  | -0.8 | 4.46 | (K) LLAAEAAVLQAEAAK     |                         |
|          |                                          |      |             |       |       |       |       |      |      |      |      |      | 2  | -1.5 | 3.64 | (R) LVLDPVPQYVVPAR      |                         |
|          |                                          |      |             |       |       |       |       |      |      |      |      |      | 2  | -1.1 | 3.24 | (R) VSFVAPQAQFTPK       |                         |
|          |                                          |      |             |       |       |       |       |      |      |      |      |      | 2  | -0.4 | 2.81 | (R) ATPDTPWPADLAVK      |                         |
|          |                                          |      |             |       |       |       |       |      |      |      |      |      | 1  | 0.1  | 2.26 | (K) IALEDLVIR           |                         |
| RRC03149 | Thiol:Disulfide interchange protein DsbA | 8003 | <i>dsbA</i> | 4     | 23.38 | 6.00  | 19.27 | 5.64 | 0.00 | 0.00 | 8.0  | 30.5 | 7  | 2    | 0.4  | 4.94                    | (K) NASADAIEGTPTLVINGEK |
|          |                                          |      |             |       |       |       |       |      |      |      |      |      | 2  | -0.2 | 2.94 | (K) SWIGDGTPEPVIAENLR   |                         |
|          |                                          |      |             |       |       |       |       |      |      |      |      |      | 1  | 0.1  | 2.85 | (R) FHETVFGALK          |                         |
|          |                                          |      |             |       |       |       |       |      |      |      |      |      | 2  | 0.1  | 2.66 | (R) FHETVFGALK          |                         |
|          |                                          |      |             |       |       |       |       |      |      |      |      |      | 1  | 0.0  | 1.87 | (K) HDNMGYAELK          |                         |
| RRC03395 | Phosphate-Binding Periplasmic Protein    | 2404 | <i>pstS</i> | 5     | 37.01 | 4.70  | 40.90 | 4.56 | 0.57 | 0.31 | 8.1  | 59.0 | 16 | 2    | -0.7 | 6.36                    | (K) ATGAYDLYMATAEGADEDK |
|          |                                          |      |             |       |       |       |       |      |      |      |      |      | 2  | 0.2  | 4.56 | (R) IGYDGFVFSADIK       |                         |
|          |                                          |      |             |       |       |       |       |      |      |      |      |      | 2  | 0.3  | 4.14 | (K) LPAQDILTFIPGTK      |                         |
|          |                                          |      |             |       |       |       |       |      |      |      |      |      | 2  | 0.3  | 3.81 | (K) ANGVDEIMEVR         |                         |
|          |                                          |      |             |       |       |       |       |      |      |      |      |      | 3  | -0.9 | 3.43 | (K) ATGAYDLYMATAEGADEDK |                         |
|          |                                          |      |             |       |       |       |       |      |      |      |      |      | 3  | 1.2  | 3.04 | (K) LPAQDILTFIPGTK      |                         |
|          |                                          |      |             |       |       |       |       |      |      |      |      |      | 1  | 0.2  | 2.62 | (R) IGYDGFVFSADIK       |                         |
|          |                                          |      |             |       |       |       |       |      |      |      |      |      | 2  | -0.7 | 2.52 | (R) VATINGIVPSTETIAK    |                         |
|          |                                          |      |             |       |       |       |       |      |      |      |      |      | 2  | 0.1  | 2.49 | (K) AHLGVIPGLK          |                         |
|          |                                          |      |             |       |       |       |       |      |      |      |      |      | 1  | 0.1  | 1.70 | (R) PLYFYVK             |                         |

|          |                                                    |      |             |   |       |      |       |      |      |      |     |      |    |   |      |      |                                |
|----------|----------------------------------------------------|------|-------------|---|-------|------|-------|------|------|------|-----|------|----|---|------|------|--------------------------------|
| RRC03417 | Flagellin                                          | 404  | <i>fliC</i> | 0 | 40.01 | 4.20 | 40.01 | 4.20 | 0.00 | 0.00 | 8.1 | 40.2 | 9  | 2 | -0.7 | 4.04 | (K) ISGAQFNGVNLISSSGNETILGSLDR |
|          |                                                    |      |             |   |       |      |       |      |      |      |     |      |    | 2 | 0.1  | 3.31 | (K) DNSAVWAISK                 |
|          |                                                    |      |             |   |       |      |       |      |      |      |     |      |    | 2 | 0.0  | 2.43 | (R) SGNTVSTNTINIAR             |
| RRC03489 | Peptidyl-Prolyl Cis-Trans Isomerase                | 1002 | <i>ppiB</i> | 0 | 20.32 | 4.60 | 19.30 | 4.43 | 0.25 | 0.31 | 8.2 | 37.3 | 5  | 3 | -2.0 | 4.08 | (R) ITQLANEHAYDDVVFHR          |
|          |                                                    |      |             |   |       |      |       |      |      |      |     |      |    | 2 | -0.5 | 3.90 | (K) GAPELNGLVEDPDYIVK          |
|          |                                                    |      |             |   |       |      |       |      |      |      |     |      |    | 2 | 0.5  | 3.60 | (K) YGDLPAEFSNR                |
|          |                                                    |      |             |   |       |      |       |      |      |      |     |      |    | 2 | 0.5  | 2.64 | (K) VVIDLLPDVAPGHVER           |
| RRC03762 | Molybdate-Binding Periplasmic Protein              | 4001 | <i>modA</i> | 3 | 30.76 | 5.19 | 26.06 | 4.94 | 0.01 | 0.01 |     |      |    | 1 | -0.2 | 3.36 | (K) SAPYGAAAEIVMQK             |
|          |                                                    |      |             |   |       |      |       |      |      |      |     |      |    | 2 | 0.4  | 3.34 | (K) LGVYETLEPK                 |
|          |                                                    |      |             |   |       |      |       |      |      |      |     |      |    | 2 | -0.3 | 3.11 | (K) TPEALEIIR                  |
|          |                                                    |      |             |   |       |      |       |      |      |      |     |      |    | 2 | 0.4  | 2.94 | (K) LVLWSADPAR                 |
|          |                                                    |      |             |   |       |      |       |      |      |      |     |      |    | 2 | 0.2  | 2.68 | (K) TDLEHVAIADPK               |
|          |                                                    |      |             |   |       |      |       |      |      |      |     |      |    | 1 | 0.0  | 2.30 | (K) LVLWSADPAR                 |
|          |                                                    |      |             |   |       |      |       |      |      |      |     |      |    | 1 | 0.0  | 1.89 | (K) AYLDFLK                    |
|          |                                                    |      |             |   |       |      |       |      |      |      |     |      |    | 1 | -0.5 | 1.78 | (K) TPEALEIIR                  |
|          |                                                    |      |             |   |       |      |       |      |      |      |     |      |    | 1 | 0.4  | 1.78 | (K) LGVYETLEPK                 |
|          |                                                    |      |             |   |       |      |       |      |      |      |     |      |    | 1 | -2.0 | 1.60 | (K) EIGALFTEK                  |
|          |                                                    |      |             |   |       |      |       |      |      |      |     |      |    | 1 | 0.0  | 1.51 | (K) YGYVTE                     |
| RRC03799 | Glutamate/Gln/Aspartate/Asparagine-Binding Protein | 2201 | <i>yhdW</i> | 5 | 35.53 | 4.49 | 34.79 | 4.54 | 0.47 | 0.46 | 8.2 | 50.3 | 13 | 2 | 0.2  | 5.37 | (K) ANLEEVAASTQNPEIR           |
|          |                                                    |      |             |   |       |      |       |      |      |      |     |      |    | 2 | 0.2  | 4.61 | (R) GLNAQWTQGGLMYAPPFR         |
|          |                                                    |      |             |   |       |      |       |      |      |      |     |      |    | 2 | 0.3  | 4.59 | (R) ATLPNAADIVLPEIISK          |
|          |                                                    |      |             |   |       |      |       |      |      |      |     |      |    | 3 | -0.4 | 4.31 | (K) ANLEEVAASTQNPEIR           |
|          |                                                    |      |             |   |       |      |       |      |      |      |     |      |    | 2 | 0.1  | 4.06 | (K) AVAAAVLGDPMK               |
|          |                                                    |      |             |   |       |      |       |      |      |      |     |      |    | 2 | 0.0  | 3.78 | (R) HGDNNWGDIVR                |
|          |                                                    |      |             |   |       |      |       |      |      |      |     |      |    | 2 | 0.2  | 3.35 | (R) LLGLEDMGK                  |
|          |                                                    |      |             |   |       |      |       |      |      |      |     |      |    | 2 | 0.3  | 2.87 | (K) IGLDNDFAK                  |
|          |                                                    |      |             |   |       |      |       |      |      |      |     |      |    | 2 | 0.0  | 2.42 | (R) NSTWTFSR                   |
|          |                                                    |      |             |   |       |      |       |      |      |      |     |      |    | 1 | 0.0  | 2.15 | (K) IGLDNDFAK                  |
| RRC04018 | Glutamin Binding Periplasmic Protein Precursor     | 1001 | <i>glnH</i> | 1 | 27.63 | 4.50 | 25.99 | 4.37 | 0.44 | 0.33 |     |      |    | 2 | 0.2  | 4.18 | (K) LGAEDFGFIFPK               |
|          |                                                    |      |             |   |       |      |       |      |      |      |     |      |    | 2 | -1.0 | 3.73 | (R) GGDVDLVLTSTAGEGYAR         |
|          |                                                    |      |             |   |       |      |       |      |      |      |     |      |    | 2 | -0.3 | 2.93 | (K) TAVDFSDPYMR                |
|          |                                                    |      |             |   |       |      |       |      |      |      |     |      |    | 2 | 0.5  | 2.65 | (K) MFETFGAGVEALR              |

|                           |                                               |      |             |       |       |       |       |      |      |      |      |      |    |      |      |                           |                             |
|---------------------------|-----------------------------------------------|------|-------------|-------|-------|-------|-------|------|------|------|------|------|----|------|------|---------------------------|-----------------------------|
| RRC04050                  | Periplasmic Leucine-Binding Proteins          | 4605 | 3           | 37.59 | 6.40  | 48.41 | 5.11  | 0.39 | 0.49 | 8.2  | 29.6 | 14   |    |      |      |                           |                             |
|                           |                                               |      |             |       |       |       |       |      |      |      |      |      | 2  | 0.3  | 4.49 | (R) DGFETLNLTEAR          |                             |
|                           |                                               |      |             |       |       |       |       |      |      |      |      |      | 2  | 0.3  | 4.22 | (K) AAGAGDQLGTVLYSR       |                             |
|                           |                                               |      |             |       |       |       |       |      |      |      |      |      | 2  | -0.1 | 2.80 | (K) ITLVYHNSAYGK          |                             |
|                           |                                               |      |             |       |       |       |       |      |      |      |      |      | 1  | -0.1 | 1.91 | (K) SQWLQIR               |                             |
| RRC04139                  | Acyl-CoA Thioesterase I Precursor (EC 3.1.2-) | 1004 | <i>tesA</i> | 1     | 24.16 | 5.30  | 22.70 | 4.51 | 0.14 | 0.01 | 8.1  | 57.0 | 11 |      |      | PMF SPECTRUM*             |                             |
|                           |                                               |      |             |       |       |       |       |      |      |      |      |      | 2  | 0.3  | 5.54 | (R) GAEVTVINAGVSGDTTSGGR* |                             |
|                           |                                               |      |             |       |       |       |       |      |      |      |      |      | 2  | 0.7  | 2.37 | (R) DLPVALVGLK*           |                             |
| RRC04244                  | Nucleoside Binding Protein                    | 4302 |             | 1     | 38.59 | 5.10  | 38.48 | 4.87 | 0.35 | 0.22 |      |      |    | 2    | 0.2  | 4.75                      | (K) IGDITEAVPAEVK           |
|                           |                                               |      |             |       |       |       |       |      |      |      |      |      | 2  | 0.5  | 4.09 | (K) VVTSFIENVPEGPDAER     |                             |
|                           |                                               |      |             |       |       |       |       |      |      |      |      |      | 1  | 0.0  | 2.59 | (K) IGDITEAVPAEVK         |                             |
| RRC04244                  | Nucleoside Binding Protein                    | 4303 |             | 1     | 38.59 | 5.10  | 38.59 | 5.08 | 0.62 | 0.47 | 8.2  | 53.9 | 16 |      |      |                           |                             |
|                           |                                               |      |             |       |       |       |       |      |      |      |      |      | 2  | 0.4  | 4.17 | (K) VVWAYTWFDPAK          |                             |
|                           |                                               |      |             |       |       |       |       |      |      |      |      |      | 2  | 0.2  | 3.91 | (R) AENLATYDAR            |                             |
|                           |                                               |      |             |       |       |       |       |      |      |      |      |      | 2  | 0.2  | 3.87 | (K) IGDITEAVPAEVK         |                             |
|                           |                                               |      |             |       |       |       |       |      |      |      |      |      | 2  | -0.4 | 3.30 | (K) ISDGSYHPFTGPLK        |                             |
|                           |                                               |      |             |       |       |       |       |      |      |      |      |      | 1  | 0.2  | 3.16 | (K) IGDITEAVPAEVK         |                             |
|                           |                                               |      |             |       |       |       |       |      |      |      |      |      | 2  | 0.0  | 3.10 | (K) KQDGSDWLAEGK          |                             |
|                           |                                               |      |             |       |       |       |       |      |      |      |      |      | 2  | -0.5 | 2.51 | (K) VVTSFIENVPEGPDAER     |                             |
|                           |                                               |      |             |       |       |       |       |      |      |      |      |      | 2  | -0.4 | 2.04 | (R) VASTIDNWPYYIK         |                             |
| <b>INCREASED PROTEINS</b> |                                               |      |             |       |       |       |       |      |      |      |      |      |    |      |      |                           |                             |
| RRC00485                  | Outer-Membrane Lipoproteins Carrier Protein   | 7003 | <i>lola</i> | 0     | 21.97 | 5.96  | 24.05 | 5.53 | 4    | 4    | 8.0  | 21.7 | 7  |      |      |                           |                             |
|                           |                                               |      |             |       |       |       |       |      |      |      |      |      | 2  | 0.3  | 3.50 | (K) SNQIAEQYPLK*          |                             |
|                           |                                               |      |             |       |       |       |       |      |      |      |      |      | 2  | 0.2  | 3.44 | (R) TPLNLILADR*           |                             |
| RRC00485                  | Outer-Membrane Lipoproteins Carrier Protein   | 7005 |             | 0     | 21.97 | 5.96  | 22.84 | 5.53 | 2    | 2    |      |      |    | 2    | 0.3  | 3.64                      | (K) SNQIAEQYPLK             |
|                           |                                               |      |             |       |       |       |       |      |      |      |      |      | 2  | 0.5  | 3.40 | (R) TPLNLILADR            |                             |
|                           |                                               |      |             |       |       |       |       |      |      |      |      |      | 2  | -1.0 | 2.62 | (K) SNQIAEQYPLKR          |                             |
| RRC00951                  | Outer Membrane Protein                        | 7002 | <i>yiaD</i> | 2     | 23.35 | 5.96  | 24.05 | 5.53 | 4    | 4    |      |      |    | 3    | -1.1 | 4.70                      | (R) YPDTTVDVVGHGTSDGDAAYNQR |
|                           |                                               |      |             |       |       |       |       |      |      |      |      |      | 2  | -0.1 | 3.74 | (R) GEEQPVASNLSAAGK       |                             |
|                           |                                               |      |             |       |       |       |       |      |      |      |      |      | 2  | 0.1  | 3.26 | (R) DLYTLGSLNR            |                             |
|                           |                                               |      |             |       |       |       |       |      |      |      |      |      | 2  | 0.1  | 3.00 | (R) ILIGAGVPSYR           |                             |
|                           |                                               |      |             |       |       |       |       |      |      |      |      |      | 2  | -0.9 | 2.30 | (R) DLDTNGVSVVR           |                             |

|          |                                      |      |             |       |       |       |       |      |     |     |      |      |    |      |      |      |                  |                     |               |
|----------|--------------------------------------|------|-------------|-------|-------|-------|-------|------|-----|-----|------|------|----|------|------|------|------------------|---------------------|---------------|
| RRC01191 | Mannitol-Binding Periplasmic Protein | 4404 | 3           | 39.82 | 5.43  | 39.59 | 5.30  | >10  | >10 | 8.2 | 44.1 | 12   |    |      |      |      |                  |                     |               |
|          |                                      |      |             |       |       |       |       |      |     |     |      |      | 2  | 0.3  | 4.83 | (K)  | SLDTIYGGAEVLSK   |                     |               |
|          |                                      |      |             |       |       |       |       |      |     |     |      |      | 2  | 0.1  | 4.38 | (R)  | KEINTVADLSGLK    |                     |               |
|          |                                      |      |             |       |       |       |       |      |     |     |      |      | 2  | 0.3  | 3.75 | (K)  | GTLDATEWVGPYDDEK |                     |               |
|          |                                      |      |             |       |       |       |       |      |     |     |      |      | 2  | 0.2  | 3.39 | (K)  | IYDSMVAFR        |                     |               |
|          |                                      |      |             |       |       |       |       |      |     |     |      |      | 2  | 0.0  | 3.29 | (K)  | EINTVADLSGLK     |                     |               |
|          |                                      |      |             |       |       |       |       |      |     |     |      |      | 1  | -0.3 | 2.89 | (K)  | SLDTIYGGAEVLSK   |                     |               |
|          |                                      |      |             |       |       |       |       |      |     |     |      |      | 1  | 0.2  | 2.41 | (R)  | KEINTVADLSGLK    |                     |               |
|          |                                      |      |             |       |       |       |       |      |     |     |      |      | 1  | 0.1  | 2.36 | (K)  | EINTVADLSGLK     |                     |               |
|          |                                      |      |             |       |       |       |       |      |     |     |      |      | 1  | 0.1  | 1.94 | (K)  | IYDSMAFR         |                     |               |
| RRC01208 | DegP (EC 3.4.21.-)                   | 2602 | <i>degP</i> | 0     | 51.57 | 4.84  | 51.42 | 4.66 | >10 | 1.6 | 8.1  | 34.5 | 12 |      |      |      |                  |                     | PMF SPECTRUM* |
|          |                                      |      |             |       |       |       |       |      |     |     |      |      |    | 2    | 0.2  | 4.27 | (R)              | AGDVIVEAGQPVTSLDDLK |               |
|          |                                      |      |             |       |       |       |       |      |     |     |      |      |    | 2    | 0.4  | 3.37 | (K)              | VVGQLQEFGATR        |               |
|          |                                      |      |             |       |       |       |       |      |     |     |      |      |    | 1    | 0.0  | 1.76 | (R)              | FVAVPLQ             |               |
| RRC01208 | DegP (EC 3.4.21.-)                   | 2705 |             | 0     | 51.57 | 4.84  | 51.91 | 4.58 | >10 | 1.7 |      |      |    | 2    | 0.3  | 6.34 | (R)              | AGDVIVEAGQPVTSLDDLK |               |
|          |                                      |      |             |       |       |       |       |      |     |     |      |      |    | 2    | 0.2  | 4.63 | (R)              | AGKPVTLQVTLGQR      |               |
|          |                                      |      |             |       |       |       |       |      |     |     |      |      |    | 2    | 0.3  | 4.34 | (K)              | SGDVIIISFAGAPVK     |               |
|          |                                      |      |             |       |       |       |       |      |     |     |      |      |    | 2    | 0.2  | 3.79 | (K)              | VVGQLQEFGATR        |               |
|          |                                      |      |             |       |       |       |       |      |     |     |      |      |    | 3    | -1.3 | 3.23 | (R)              | AGKPVTLQVTLGQR      |               |
|          |                                      |      |             |       |       |       |       |      |     |     |      |      |    | 1    | 0.6  | 3.22 | (K)              | SGDVIIISFAGAPVK     |               |
|          |                                      |      |             |       |       |       |       |      |     |     |      |      |    | 3    | -0.5 | 3.14 | (R)              | AGDVIVEAGQPVTSLDDLK |               |
|          |                                      |      |             |       |       |       |       |      |     |     |      |      |    | 2    | -1.9 | 2.94 | (K)              | GEDGNTVADEISIEFANGK |               |
|          |                                      |      |             |       |       |       |       |      |     |     |      |      |    | 1    | 0.0  | 2.90 | (R)              | AGKPVTLQVTLGQR      |               |
|          |                                      |      |             |       |       |       |       |      |     |     |      |      |    | 2    | 0.1  | 2.86 | (R)              | KSVLLLIR            |               |
|          |                                      |      |             |       |       |       |       |      |     |     |      |      |    | 2    | 0.1  | 2.53 | (R)              | RGWLGVK             |               |
|          |                                      |      |             |       |       |       |       |      |     |     |      |      |    | 1    | -1.0 | 2.41 | (K)              | VVGQLQEFGATR        |               |
|          |                                      |      |             |       |       |       |       |      |     |     |      |      |    | 1    | 0.3  | 2.24 | (R)              | FVAVPLQ             |               |
|          |                                      |      |             |       |       |       |       |      |     |     |      |      |    | 1    | -0.9 | 2.04 | (K)              | TDIALLK             |               |
|          |                                      |      |             |       |       |       |       |      |     |     |      |      |    | 1    | 0.0  | 1.90 | (R)              | KSVLLLIR            |               |
|          |                                      |      |             |       |       |       |       |      |     |     |      |      |    | 1    | -1.1 | 1.58 | (K)              | SVLLLIR             |               |
|          |                                      |      |             |       |       |       |       |      |     |     |      |      |    | 1    | 0.0  | 1.52 | (R)              | RGWLGVK             |               |
| RRC01208 | DegP (EC 3.4.21.-)                   | 2706 |             | 0     | 51.54 | 4.84  | 52.40 | 4.56 | >10 | 1.7 |      |      |    | 2    | -0.7 | 2.97 | (K)              | VVGQLQEFGATR        |               |
|          |                                      |      |             |       |       |       |       |      |     |     |      |      |    | 1    | 1.1  | 2.40 | (K)              | SGDVIIISFAGAPVK     |               |
|          |                                      |      |             |       |       |       |       |      |     |     |      |      |    | 1    | -0.9 | 2.11 | (K)              | VVGQLQEFGATR        |               |
|          |                                      |      |             |       |       |       |       |      |     |     |      |      |    | 1    | 0.3  | 1.66 | (R)              | AGKPVTLQVTLGQR      |               |



|          |                                                                                   |      |             |       |       |       |       |      |     |     |      |      |    |      |      |                           |
|----------|-----------------------------------------------------------------------------------|------|-------------|-------|-------|-------|-------|------|-----|-----|------|------|----|------|------|---------------------------|
|          |                                                                                   |      |             |       |       |       |       |      |     |     |      |      | 2  | -0.7 | 1.50 | (R) AGKPVTLQVTLGQR        |
|          |                                                                                   |      |             |       |       |       |       |      |     |     |      |      | 1  | 0.0  | 1.43 | (R) KSVLLLIR              |
|          |                                                                                   |      |             |       |       |       |       |      |     |     |      |      | 1  | -0.3 | 1.38 | (R) GWLGVK                |
|          |                                                                                   |      |             |       |       |       |       |      |     |     |      |      | 1  | -0.1 | 1.33 | (K) SVLLLIR               |
| RRC01208 | DegP (EC 3.4.21.-)                                                                | 3609 | 0           | 51.54 | 4.84  | 52.85 | 4.61  | >10  | 1.7 |     |      |      | 2  | 0.4  | 6.88 | (R) AGDVIVEAGQPVTSLDDLK   |
|          |                                                                                   |      |             |       |       |       |       |      |     |     |      |      | 2  | 0.3  | 4.74 | (K) SGDVIIIFAGAPVK        |
|          |                                                                                   |      |             |       |       |       |       |      |     |     |      |      | 2  | 0.2  | 4.23 | (R) AGKPVTLQVTLGQR        |
|          |                                                                                   |      |             |       |       |       |       |      |     |     |      |      | 2  | 0.3  | 3.98 | (R) VADAPVGQAVDVVVMR      |
|          |                                                                                   |      |             |       |       |       |       |      |     |     |      |      | 3  | -0.8 | 3.65 | (R) AGKPVTLQVTLGQR        |
|          |                                                                                   |      |             |       |       |       |       |      |     |     |      |      | 2  | -1.1 | 3.48 | (R) GNSGGPLFSMDGK         |
|          |                                                                                   |      |             |       |       |       |       |      |     |     |      |      | 2  | 0.9  | 3.29 | (K) EFGMPNMPQGGPQR        |
|          |                                                                                   |      |             |       |       |       |       |      |     |     |      |      | 3  | -0.7 | 3.27 | (K) VVGQLQEFGATR          |
|          |                                                                                   |      |             |       |       |       |       |      |     |     |      |      | 2  | 0.2  | 3.11 | (K) VVGQLQEFGATR          |
|          |                                                                                   |      |             |       |       |       |       |      |     |     |      |      | 2  | 0.1  | 3.05 | (R) KSVLLLIR              |
|          |                                                                                   |      |             |       |       |       |       |      |     |     |      |      | 1  | 0.0  | 2.86 | (K) VVGQLQEFGATR          |
|          |                                                                                   |      |             |       |       |       |       |      |     |     |      |      | 1  | 0.1  | 2.59 | (R) GNSGGPLFSMDGK         |
|          |                                                                                   |      |             |       |       |       |       |      |     |     |      |      | 1  | -0.1 | 2.49 | (R) FVAVPLQ               |
|          |                                                                                   |      |             |       |       |       |       |      |     |     |      |      | 2  | -1.0 | 2.27 | (K) EPLPFVSGDSDTMR        |
| RRC01299 | Taurine-Binding Periplasmic Protein                                               | 208  | 2           | 34.91 | 4.60  | 35.20 | 4.37  | >10  | >10 | 8.1 | 26.0 | 8    |    |      |      | PMF SPECTRUM*             |
| RRC01654 | Hypothetical Exported Protein                                                     | 2704 | 2           | 56.26 | 4.50  | 58.83 | 4.56  | >10  | >10 | 8.2 | 30.2 | 12   |    |      |      |                           |
|          |                                                                                   |      |             |       |       |       |       |      |     |     |      |      | 2  | 0.2  | 4.52 | (R) LDSAAGSLALDR          |
|          |                                                                                   |      |             |       |       |       |       |      |     |     |      |      | 2  | -0.6 | 3.67 | (R) TVSEGVFAAEQAR         |
|          |                                                                                   |      |             |       |       |       |       |      |     |     |      |      | 2  | 0.2  | 3.50 | (R) GVALVLSTAR            |
|          |                                                                                   |      |             |       |       |       |       |      |     |     |      |      | 2  | 0.1  | 2.51 | (K) QALDALQNPK            |
|          |                                                                                   |      |             |       |       |       |       |      |     |     |      |      | 1  | 0.1  | 1.54 | (R) GVALVLSTAR            |
| RRC02959 | CDP-Diacylglycerol-Glycerol-3-Phosphate<br>3-Phosphatidyltransferase (EC 2.7.8.5) | 2107 | <i>pgsA</i> | 0     | 23.02 | 10.02 | 29.23 | 4.55 | 6   | 5   |      |      | 2  | 1.5  | 2.43 | (R) EFIGADAGKLVTK*        |
|          |                                                                                   |      |             |       |       |       |       |      |     |     |      |      | 2  | 1.2  | 2.40 | (R) EFIGADAGKLVTK         |
| RRC03107 | Zinc Protease (EC 3.4.99.-)                                                       | 2601 | <i>ymfH</i> | 0     | 49.75 | 4.70  | 49.56 | 4.56 | >10 | >10 | 8.2  | 48.3 | 19 |      |      |                           |
|          |                                                                                   |      |             |       |       |       |       |      |     |     |      |      | 2  | 0.2  | 5.74 | (R) ASQIYEQDDTEALQR       |
|          |                                                                                   |      |             |       |       |       |       |      |     |     |      |      | 2  | 0.2  | 5.35 | (R) YYAPNDAVLVVAGDVTPDQVK |
|          |                                                                                   |      |             |       |       |       |       |      |     |     |      |      | 2  | 0.2  | 4.19 | (R) AAQFLNSPYGTPVIGWR     |
|          |                                                                                   |      |             |       |       |       |       |      |     |     |      |      | 2  | 0.3  | 3.99 | (K) GTDTLAAGELSK          |
|          |                                                                                   |      |             |       |       |       |       |      |     |     |      |      | 2  | -0.1 | 3.86 | (R) APVVVQMVWYR           |
|          |                                                                                   |      |             |       |       |       |       |      |     |     |      |      | 2  | 0.2  | 2.78 | (K) DVDLPSAEAAALDK        |

|          |                                                     |      |             |       |       |       |       |      |     |     |      |    |   |      |      |                          |
|----------|-----------------------------------------------------|------|-------------|-------|-------|-------|-------|------|-----|-----|------|----|---|------|------|--------------------------|
|          |                                                     |      |             |       |       |       |       |      |     |     |      |    | 1 | -0.2 | 1.88 | (R) LELVMK               |
| RRC03108 | Zinc Protease                                       | 2501 | 0           | 46.69 | 4.54  | 46.43 | 4.55  | 10   | 14  | 8.1 | 42.5 | 18 |   |      |      | PMF SPECTRUM*            |
|          |                                                     |      |             |       |       |       |       |      |     |     |      |    | 2 | 0.1  | 2.72 | (K) TYLTGAYPLR*          |
|          |                                                     |      |             |       |       |       |       |      |     |     |      |    | 3 | -0.1 | 2.35 | (R) GALTDPHFQASVDR*      |
| RRC03108 | Zinc Protease                                       | 1506 | 0           | 46.69 | 4.54  | 46.70 | 4.55  | >10  | >10 | 8.1 | 40.4 | 16 |   |      |      | PMF SPECTRUM*            |
| RRC03327 | Protease (Transglutaminase-Like Protein)            | 601  | 10          | 67.05 | 8.11  | 51.41 | 9.50  | 4    | 5   |     |      |    | 2 | -0.1 | 4.63 | (K) QYSAYGFTVTPGAVAR     |
|          |                                                     |      |             |       |       |       |       |      |     |     |      |    | 2 | -0.2 | 3.32 | (R) TNSQMSYGALSYTMSSK    |
|          |                                                     |      |             |       |       |       |       |      |     |     |      |    | 2 | 0.4  | 2.54 | (K) GDSLMPEGADAAELGDAIAK |
| RRC03455 | Outer Membrane Protein/DsbA-like thioredoxin domain | 2106 | 2           | 26.79 | 4.57  | 27.03 | 4.54  | 5    | 7   |     |      |    | 2 | 0.3  | 4.73 | (K) AVLAQMNSEEVTSVLR     |
|          |                                                     |      |             |       |       |       |       |      |     |     |      |    | 2 | 0.2  | 4.35 | (K) EFPILSDQSVLAAR       |
|          |                                                     |      |             |       |       |       |       |      |     |     |      |    | 2 | 0.3  | 3.67 | (K) AYEVVDEVLKK          |
|          |                                                     |      |             |       |       |       |       |      |     |     |      |    | 2 | -0.6 | 3.62 | (K) KAYEVVDEVLKK         |
|          |                                                     |      |             |       |       |       |       |      |     |     |      |    | 2 | 0.2  | 3.20 | (K) AYEVVDEVLKK          |
|          |                                                     |      |             |       |       |       |       |      |     |     |      |    | 3 | -1.2 | 2.64 | (K) AYEVVDEVLKK          |
|          |                                                     |      |             |       |       |       |       |      |     |     |      |    | 1 | 0.1  | 2.30 | (K) AYEVVDEVLKK          |
|          |                                                     |      |             |       |       |       |       |      |     |     |      |    | 2 | 0.8  | 2.20 | (K) AYLMENPEVLVEAINK     |
|          |                                                     |      |             |       |       |       |       |      |     |     |      |    | 1 | 0.1  | 2.14 | (K) AYEVVDEVLKK          |
| RRC03455 | Outer Membrane Protein/DsbA-like thioredoxin domain | 2102 | 2           | 26.79 | 4.57  | 28.35 | 4.55  | 3    | 3   |     |      |    | 2 | -1.0 | 3.18 | (K) EFPILSDQSVLAAR       |
|          |                                                     |      |             |       |       |       |       |      |     |     |      |    | 1 | -0.9 | 2.59 | (K) AYEVVDEVLKK          |
|          |                                                     |      |             |       |       |       |       |      |     |     |      |    | 1 | 0.0  | 2.38 | (K) AYEVVDEVLKK          |
| RRC04027 | Periplasmic Glucans Biosynthesis Protein MdoG       | 4806 | <i>mdoG</i> | 1     | 62.62 | 5.38  | 58.48 | 5.27 | 5   | 7   |      |    | 2 | 0.2  | 3.44 | (R) LASSYFSETAPK         |
|          |                                                     |      |             |       |       |       |       |      |     |     |      |    | 2 | 0.2  | 2.43 | (K) DFDDYRPK             |
|          |                                                     |      |             |       |       |       |       |      |     |     |      |    | 1 | -0.1 | 1.46 | (K) VHSDSGLGIVR          |
| RRC04580 | Peptidyl-Prolyl Cis-Trans Isomerase (EC 5.2.1.8)    | 3207 | 0           | 30.84 | 5.00  | 31.08 | 4.77  | 5    | 8   |     |      |    | 2 | 0.3  | 4.86 | (K) AEIDGGADFATVAK       |
|          |                                                     |      |             |       |       |       |       |      |     |     |      |    | 2 | 0.5  | 3.91 | (R) LGAAPTLEEATEELSGDLR  |
|          |                                                     |      |             |       |       |       |       |      |     |     |      |    | 2 | 0.1  | 3.72 | (R) RDEIALEVER           |
|          |                                                     |      |             |       |       |       |       |      |     |     |      |    | 2 | 0.3  | 2.74 | (R) VEGIDPAVLK           |
|          |                                                     |      |             |       |       |       |       |      |     |     |      |    | 3 | -1.5 | 2.54 | (R) RDEIALEVER           |

<sup>a</sup> SSP# corresponds to the spot numbers given by the image analysis program PDQuest. <sup>b</sup> Cys indicates the number of cysteine residues found.

<sup>c</sup> MD20/MT1131 and MD20R3/MT1131 indicate the ratio of a given spot between these strains. Note that all proteins listed except PgaA which is an integral membrane protein, have a putative signal sequence recognized by the program Signal

<sup>d</sup> Protein identification by MALDI-TOF-MS / peptide mass fingerprint (PMF) and the corresponding score, cov% (percentage of coverage) and NMP (number of matched peptides) are indicated.

<sup>e</sup> Protein identification by nLC-MS/MS and the corresponding z (charge), ΔM (mass difference) and X<sub>corr</sub> (scores) values are indicated.

\* Spectra are provided in Supplemental Figure 1 and 2.
