# Supplementary material
Source: PubMed Central journal article supplement (PMC2401338)
Supplement: M700433-MCP200_2.pdf [file M700433-MCP200_2.pdf]

# SUPPLEMENTAL FIGURE 1.

## A. RRC02811 (5002)

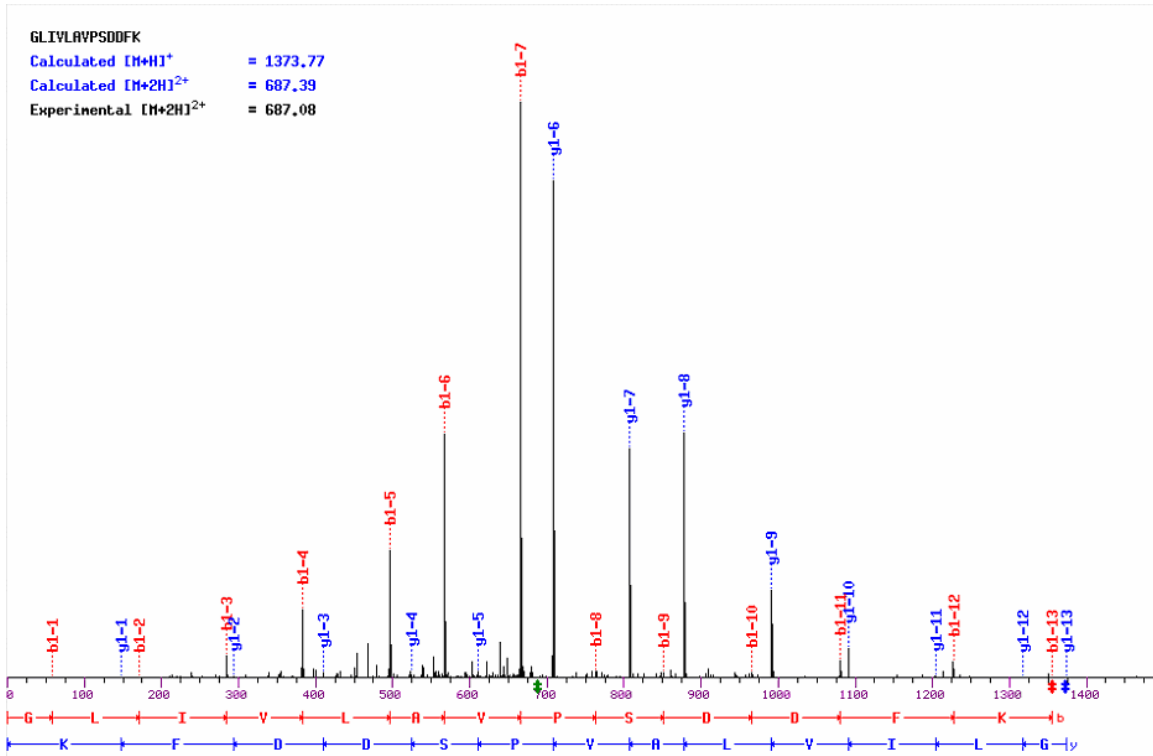

Header: rrc02811, GLUTATHIONE PEROXIDASE (EC 1.11.1.9) 139409:139957 reverse MW:19409  
Avg Mass: 19409.4 Coverage: 13/183 = 7.1% by amino acid count, 1373.6/19409.4 = 7.1% by mass

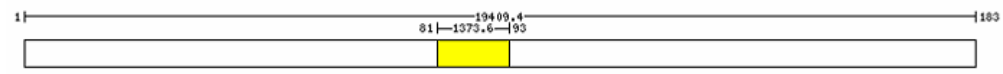

MKIKLMAAAV LTGFGAFAAP AARATEAAAP SFTFASIEGG VIDTAAYRGH PVLVVMASL CGFTPQLEGL QALHKAMGPK **GLIVLAVPSD**  
**DFK**QLESGK EWSEFCTLTLY GLTVPMTDIT PVLGEGAHFP FKWLKETQGF VPRWVFNKVL LDGEGRVVAT WGSMTKPSS AIRAAFEPLL  
PGA

Sort by: Sequence  Position   
PepStat GLIVLAVPSDDFK 81 - 93

# Sequence Ions

GLIVLAVPSDDFK

Calculated [M+H]<sup>+</sup> 1373.77

Calculated [M+2H]<sup>2+</sup> 687.39

Experimental [M+2H]<sup>2+</sup> 687.08

| 1+ | #  | y              | y*             | y°             | #  | b              | b*             | b°             | a              | a*             | a°             | Pro    |
|----|----|----------------|----------------|----------------|----|----------------|----------------|----------------|----------------|----------------|----------------|--------|
| G  | 13 | <u>1373.77</u> | 1356.77        | 1355.77        | 1  | 58.03          | 41.03          | 40.03          | 30.03          | 13.03          | 12.03          |        |
| L  | 12 | <u>1316.75</u> | 1299.75        | 1298.75        | 2  | 171.11         | 154.11         | 153.11         | 143.12         | 126.12         | 125.12         |        |
| I  | 11 | <u>1203.66</u> | <u>1186.66</u> | <u>1185.66</u> | 3  | <u>284.20</u>  | <u>267.20</u>  | <u>266.20</u>  | <u>256.20</u>  | <u>239.20</u>  | <u>238.20</u>  |        |
| V  | 10 | <u>1090.58</u> | 1073.58        | 1072.58        | 4  | <u>383.27</u>  | <u>366.27</u>  | <u>365.27</u>  | <u>355.27</u>  | <u>338.27</u>  | <u>337.27</u>  |        |
| L  | 9  | <u>991.51</u>  | 974.51         | 973.51         | 5  | <u>496.35</u>  | <u>479.35</u>  | <u>478.35</u>  | <u>468.35</u>  | <u>451.35</u>  | 450.35         |        |
| A  | 8  | <u>878.43</u>  | <u>861.43</u>  | <u>860.43</u>  | 6  | <u>567.39</u>  | 550.39         | 549.39         | <u>539.39</u>  | 522.39         | 521.39         |        |
| V  | 7  | <u>807.39</u>  | 790.39         | 789.39         | 7  | <u>666.46</u>  | 649.46         | 648.46         | <u>638.46</u>  | <u>621.46</u>  | 620.46         |        |
| P  | 6  | <u>708.32</u>  | 691.32         | 690.32         | 8  | <u>763.51</u>  | 746.51         | 745.51         | <u>735.51</u>  | 718.51         | 717.51         | 98.06  |
| S  | 5  | <u>611.27</u>  | 594.27         | 593.27         | 9  | <u>850.54</u>  | 833.54         | 832.54         | <u>822.55</u>  | <u>805.55</u>  | 804.55         | 185.09 |
| D  | 4  | <u>524.24</u>  | 507.24         | 506.24         | 10 | <u>965.57</u>  | 948.57         | 947.57         | <u>937.57</u>  | 920.57         | 919.57         | 300.12 |
| D  | 3  | <u>409.21</u>  | 392.21         | 391.21         | 11 | <u>1080.59</u> | 1063.59        | 1062.59        | <u>1052.60</u> | <u>1035.60</u> | <u>1034.60</u> | 415.15 |
| F  | 2  | <u>294.18</u>  | 277.18         | 276.18         | 12 | <u>1227.66</u> | 1210.66        | 1209.66        | <u>1199.67</u> | 1182.67        | 1181.67        | 562.21 |
| K  | 1  | 147.11         | 130.11         | 129.11         | 13 | <u>1355.76</u> | <u>1338.76</u> | <u>1337.76</u> | <u>1327.76</u> | 1310.76        | 1309.76        | 690.31 |

| 2+ | #  | y             | y*            | y°            | #  | b             | b*            | b°            | a             | a*            | a°     | Pro    |
|----|----|---------------|---------------|---------------|----|---------------|---------------|---------------|---------------|---------------|--------|--------|
| G  | 13 | <u>687.39</u> | <u>678.89</u> | 678.39        | 1  | 29.52         | 21.02         | 20.52         | 15.52         | 7.02          | 6.52   |        |
| L  | 12 | <u>658.88</u> | 650.38        | 649.88        | 2  | 86.06         | 77.56         | 77.06         | 72.06         | 63.56         | 63.06  |        |
| I  | 11 | <u>602.34</u> | 593.84        | 593.34        | 3  | 142.60        | 134.10        | 133.60        | 128.61        | 120.11        | 119.61 |        |
| V  | 10 | <u>545.79</u> | 537.29        | 536.79        | 4  | 192.14        | 183.64        | 183.14        | 178.14        | 169.64        | 169.14 |        |
| L  | 9  | <u>496.26</u> | 487.76        | 487.26        | 5  | <u>248.68</u> | <u>240.18</u> | <u>239.68</u> | <u>234.68</u> | 226.18        | 225.68 |        |
| A  | 8  | <u>439.72</u> | <u>431.22</u> | <u>430.72</u> | 6  | <u>284.20</u> | 275.70        | 275.20        | <u>270.20</u> | 261.70        | 261.20 |        |
| V  | 7  | <u>404.20</u> | 395.70        | 395.20        | 7  | <u>333.73</u> | <u>325.23</u> | <u>324.73</u> | <u>319.73</u> | <u>311.23</u> | 310.73 |        |
| P  | 6  | <u>354.66</u> | 346.16        | 345.66        | 8  | <u>382.26</u> | 373.76        | 373.26        | <u>368.26</u> | 359.76        | 359.26 | 49.53  |
| S  | 5  | <u>306.14</u> | 297.64        | 297.14        | 9  | <u>425.77</u> | <u>417.27</u> | <u>416.77</u> | <u>411.78</u> | 403.28        | 402.78 | 93.05  |
| D  | 4  | <u>262.62</u> | <u>254.12</u> | <u>253.62</u> | 10 | <u>483.29</u> | 474.79        | 474.29        | <u>469.29</u> | 460.79        | 460.29 | 150.56 |
| D  | 3  | 205.11        | 196.61        | 196.11        | 11 | <u>540.80</u> | 532.30        | 531.80        | <u>526.80</u> | 518.30        | 517.80 | 208.08 |
| F  | 2  | 147.59        | 139.09        | 138.59        | 12 | <u>614.34</u> | 605.84        | 605.34        | <u>600.34</u> | 591.84        | 591.34 | 281.61 |
| K  | 1  | 74.06         | 65.56         | 65.06         | 13 | <u>678.38</u> | <u>669.88</u> | <u>669.38</u> | <u>664.39</u> | 655.89        | 655.39 | 345.66 |

## B. RRC02811 (5002)

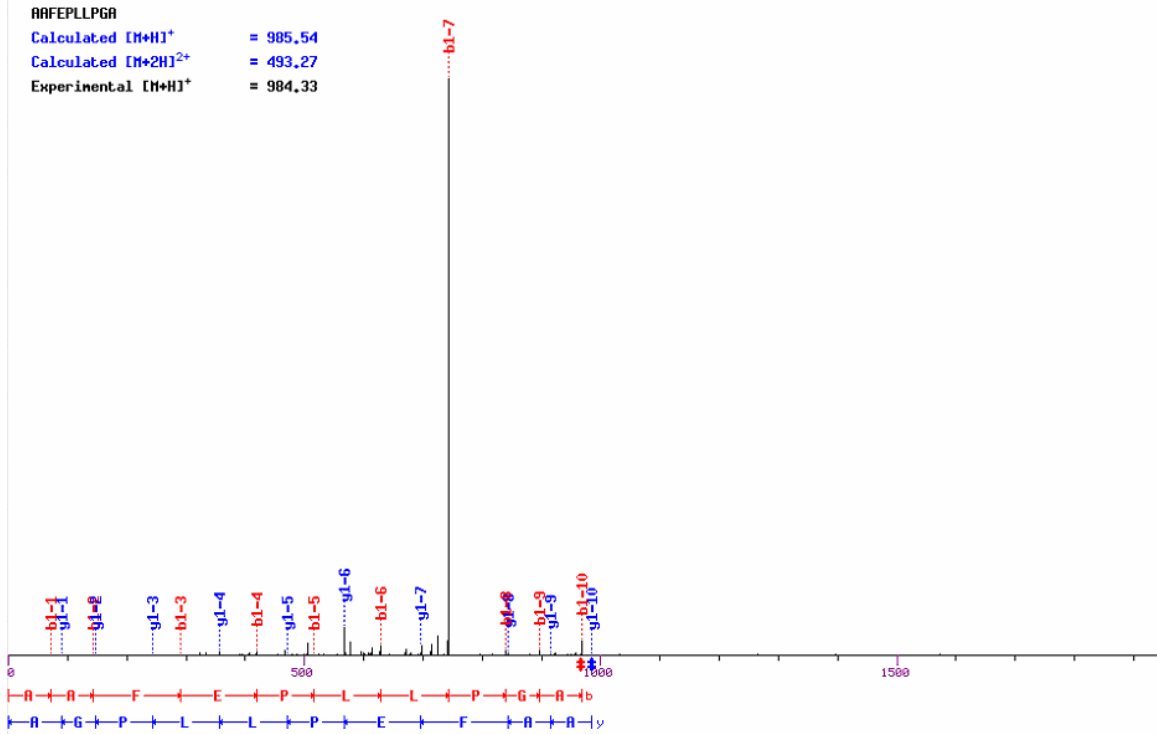

Sort by:  Sequence  Position  
[PepStat](#) AAFEPLLPGA 174 - 183

### AAFEPLLPGA

Calculated [M+H]<sup>+</sup> 985.54

Calculated [M+2H]<sup>2+</sup> 493.27

Experimental [M+H]<sup>+</sup> 984.33

| 1+ | #  | y                      | y*                     | y°                     | #  | b                      | b*                     | b°                     | a                      | a*                     | a°                     | Pro                    | Pro    |
|----|----|------------------------|------------------------|------------------------|----|------------------------|------------------------|------------------------|------------------------|------------------------|------------------------|------------------------|--------|
| A  | 10 | <a href="#">985.54</a> | <a href="#">968.54</a> | <a href="#">967.54</a> | 1  | 72.04                  | 55.04                  | 54.04                  | 44.05                  | 27.05                  | 26.05                  |                        |        |
| A  | 9  | <a href="#">914.50</a> | <a href="#">897.50</a> | <a href="#">896.50</a> | 2  | 143.08                 | 126.08                 | 125.08                 | 115.09                 | 98.09                  | 97.09                  |                        |        |
| F  | 8  | <a href="#">843.46</a> | 826.46                 | 825.46                 | 3  | <a href="#">290.15</a> | <a href="#">273.15</a> | <a href="#">272.15</a> | 262.16                 | 245.16                 | 244.16                 |                        |        |
| E  | 7  | <a href="#">696.39</a> | <a href="#">679.39</a> | <a href="#">678.39</a> | 4  | <a href="#">419.19</a> | <a href="#">402.19</a> | <a href="#">401.19</a> | <a href="#">391.20</a> | 374.20                 | 373.20                 |                        |        |
| P  | 6  | <a href="#">567.35</a> | 550.35                 | 549.35                 | 5  | <a href="#">516.25</a> | <a href="#">499.25</a> | <a href="#">498.25</a> | <a href="#">488.25</a> | 471.25                 | 470.25                 | 98.06                  |        |
| L  | 5  | <a href="#">470.30</a> | 453.30                 | 452.30                 | 6  | <a href="#">629.33</a> | <a href="#">612.33</a> | <a href="#">611.33</a> | <a href="#">601.33</a> | 584.33                 | 583.33                 | 211.14                 |        |
| L  | 4  | <a href="#">357.21</a> | 340.21                 | 339.21                 | 7  | <a href="#">742.41</a> | <a href="#">725.41</a> | <a href="#">724.41</a> | <a href="#">714.42</a> | 697.42                 | 696.42                 | <a href="#">324.23</a> |        |
| P  | 3  | 244.13                 | 227.13                 | 226.13                 | 8  | <a href="#">839.47</a> | <a href="#">822.47</a> | <a href="#">821.47</a> | <a href="#">811.47</a> | 794.47                 | 793.47                 | 421.28                 | 98.06  |
| G  | 2  | 147.08                 | 130.08                 | 129.08                 | 9  | <a href="#">896.49</a> | <a href="#">879.49</a> | <a href="#">878.49</a> | <a href="#">868.49</a> | 851.49                 | 850.49                 | <a href="#">478.30</a> | 155.08 |
| A  | 1  | 90.06                  | 73.06                  | 72.06                  | 10 | <a href="#">967.53</a> | <a href="#">950.53</a> | <a href="#">949.53</a> | <a href="#">939.53</a> | <a href="#">922.53</a> | <a href="#">921.53</a> | 549.34                 | 226.12 |

### C. RRC02959 (2107)

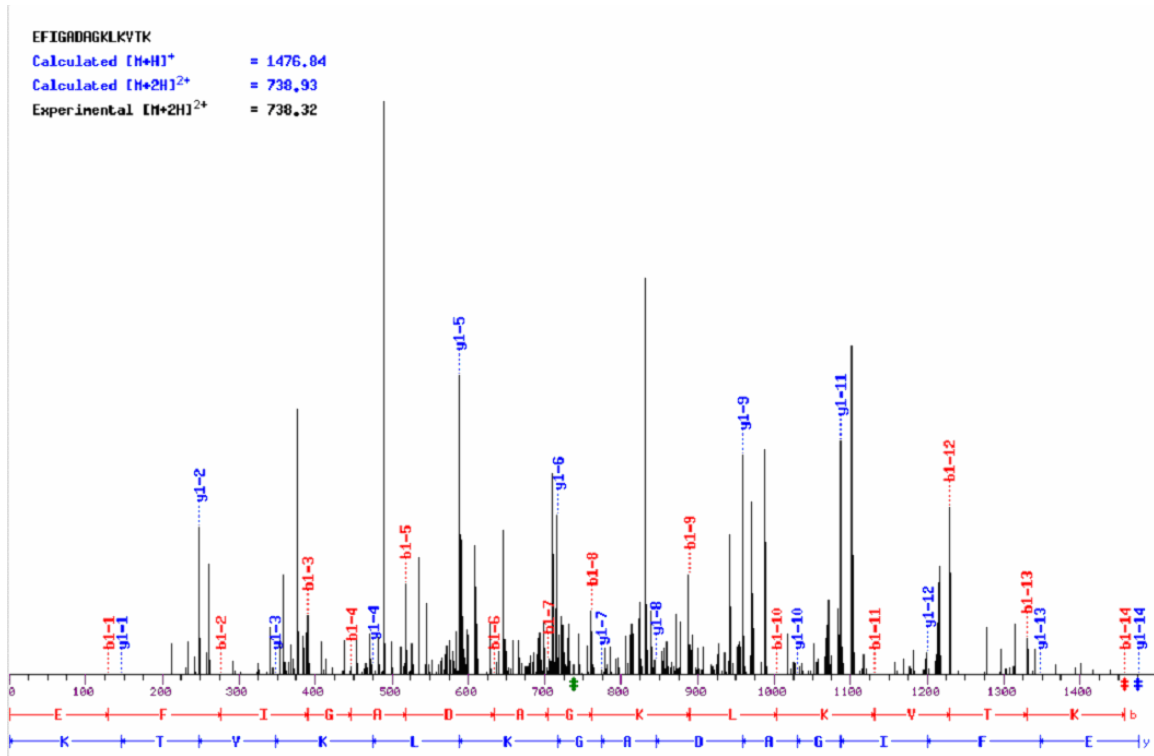

**Header:** rrc02959, CDP-DIACYLGLYCEROL--GLYCEROL-3-PHOSPHATE 3-PHOSPHATIDYLTRANSFERASE (EC 2.7.8.5)  
 484040:484666 reverse MW:23018

**Avg Mass:** 23018.2      **Coverage:** 14/209 = 6.7% by amino acid count, 1476.7/23018.2 = 6.4% by mass

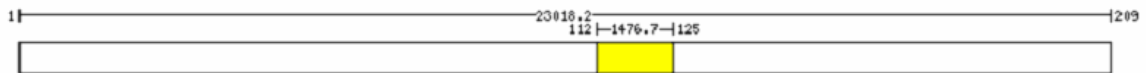

MKGNLPNSLT VLRLLIAPGV AVMFYFARP WADWFALTIF IGAAVTDWFD GYLARAQKQE SKFGAMLDPI ADKAMVVIAL VVITGYSGMN  
 PWLILPATVI LFREVFVSGL **REFIGADAGK LKLVTK**LAKWK TTAQNVIAI LFLGTGLDYL EKGRAPRAGE GNLPNFASLA DLANHVGLAL  
 IWVAAVLTAI TGWDYFRKAL PFLRDHKS

Sort by:      Sequence       Position   
[PepStat](#)      EFIGADAGLKLVTK      112 - 125

EFIGADAGKLVTK

Calculated [M+H]<sup>+</sup> 1476.84

Calculated [M+2H]<sup>2+</sup> 738.93

Experimental [M+2H]<sup>2+</sup> 738.32

| 1+ | #  | y              | y <sup>*</sup> | y <sup>°</sup> | #  | b              | b <sup>*</sup> | b <sup>°</sup> | a              | a <sup>*</sup> | a <sup>°</sup> |
|----|----|----------------|----------------|----------------|----|----------------|----------------|----------------|----------------|----------------|----------------|
| E  | 14 | <u>1476.84</u> | 1459.84        | 1458.84        | 1  | 130.05         | 113.05         | 112.05         | 102.06         | 85.06          | 84.06          |
| F  | 13 | <u>1347.80</u> | <u>1330.80</u> | <u>1329.80</u> | 2  | <u>277.12</u>  | <u>260.12</u>  | <u>259.12</u>  | <u>249.12</u>  | 232.12         | 231.12         |
| I  | 12 | <u>1200.73</u> | 1183.73        | 1182.73        | 3  | <u>390.20</u>  | 373.20         | 372.20         | <u>362.21</u>  | 345.21         | 344.21         |
| G  | 11 | <u>1087.65</u> | <u>1070.65</u> | <u>1069.65</u> | 4  | <u>447.22</u>  | 430.22         | 429.22         | <u>419.23</u>  | 402.23         | 401.23         |
| A  | 10 | <u>1030.63</u> | 1013.63        | 1012.63        | 5  | <u>518.26</u>  | 501.26         | 500.26         | <u>490.27</u>  | <u>473.27</u>  | <u>472.27</u>  |
| D  | 9  | <u>959.59</u>  | <u>942.59</u>  | <u>941.59</u>  | 6  | <u>633.29</u>  | 616.29         | 615.29         | <u>605.29</u>  | <u>588.29</u>  | <u>587.29</u>  |
| A  | 8  | <u>844.56</u>  | 827.56         | 826.56         | 7  | <u>704.33</u>  | 687.33         | 686.33         | <u>676.33</u>  | 659.33         | 658.33         |
| G  | 7  | <u>773.52</u>  | 756.52         | 755.52         | 8  | <u>761.35</u>  | 744.35         | 743.35         | <u>733.35</u>  | <u>716.35</u>  | <u>715.35</u>  |
| K  | 6  | <u>716.50</u>  | <u>699.50</u>  | <u>698.50</u>  | 9  | <u>889.44</u>  | <u>872.44</u>  | <u>871.44</u>  | <u>861.45</u>  | 844.45         | 843.45         |
| L  | 5  | <u>588.41</u>  | 571.41         | <u>570.41</u>  | 10 | <u>1002.53</u> | 985.53         | 984.53         | <u>974.53</u>  | <u>957.53</u>  | <u>956.53</u>  |
| K  | 4  | <u>475.32</u>  | 458.32         | 457.32         | 11 | <u>1130.62</u> | 1113.62        | 1112.62        | <u>1102.63</u> | <u>1085.63</u> | <u>1084.63</u> |
| V  | 3  | <u>347.23</u>  | 330.23         | 329.23         | 12 | <u>1229.69</u> | <u>1212.69</u> | <u>1211.69</u> | <u>1201.69</u> | 1184.69        | 1183.69        |
| T  | 2  | <u>248.16</u>  | 231.16         | 230.16         | 13 | <u>1330.74</u> | <u>1313.74</u> | <u>1312.74</u> | <u>1302.74</u> | 1285.74        | 1284.74        |
| K  | 1  | 147.11         | 130.11         | 129.11         | 14 | <u>1458.83</u> | 1441.83        | 1440.83        | <u>1430.84</u> | 1413.84        | 1412.84        |

| 2+ | #  | y             | y <sup>*</sup> | y <sup>°</sup> | #  | b             | b <sup>*</sup> | b <sup>°</sup> | a             | a <sup>*</sup> | a <sup>°</sup> |
|----|----|---------------|----------------|----------------|----|---------------|----------------|----------------|---------------|----------------|----------------|
| E  | 14 | <u>738.93</u> | <u>730.43</u>  | <u>729.93</u>  | 1  | 65.53         | 57.03          | 56.53          | 51.53         | 43.03          | 42.53          |
| F  | 13 | <u>674.40</u> | 665.90         | <u>665.40</u>  | 2  | 139.06        | 130.56         | 130.06         | 125.07        | 116.57         | 116.07         |
| I  | 12 | <u>600.87</u> | <u>592.37</u>  | <u>591.87</u>  | 3  | 195.61        | 187.11         | 186.61         | 181.61        | 173.11         | 172.61         |
| G  | 11 | <u>544.33</u> | 535.83         | <u>535.33</u>  | 4  | <u>224.12</u> | 215.62         | 215.12         | 210.12        | 201.62         | 201.12         |
| A  | 10 | <u>515.82</u> | 507.32         | 506.82         | 5  | <u>259.63</u> | 251.13         | 250.63         | <u>245.64</u> | 237.14         | 236.64         |
| D  | 9  | <u>480.30</u> | <u>471.80</u>  | <u>471.30</u>  | 6  | <u>317.15</u> | 308.65         | 308.15         | <u>303.15</u> | 294.65         | 294.15         |
| A  | 8  | <u>422.78</u> | 414.28         | 413.78         | 7  | <u>352.67</u> | 344.17         | 343.67         | <u>338.67</u> | 330.17         | 329.67         |
| G  | 7  | <u>387.27</u> | 378.77         | <u>378.27</u>  | 8  | <u>381.18</u> | 372.68         | 372.18         | <u>367.18</u> | <u>358.68</u>  | <u>358.18</u>  |
| K  | 6  | <u>358.76</u> | 350.26         | 349.76         | 9  | <u>445.22</u> | 436.72         | 436.22         | <u>431.23</u> | 422.73         | 422.23         |
| L  | 5  | <u>294.71</u> | 286.21         | 285.71         | 10 | <u>501.77</u> | 493.27         | 492.77         | <u>487.77</u> | 479.27         | 478.77         |
| K  | 4  | <u>238.17</u> | 229.67         | 229.17         | 11 | <u>565.81</u> | 557.31         | 556.81         | <u>551.82</u> | <u>543.32</u>  | <u>542.82</u>  |
| V  | 3  | 174.12        | 165.62         | 165.12         | 12 | <u>615.35</u> | 606.85         | 606.35         | <u>601.35</u> | <u>592.85</u>  | <u>592.35</u>  |
| T  | 2  | 124.58        | 116.08         | 115.58         | 13 | <u>665.87</u> | 657.37         | 656.87         | <u>651.87</u> | 643.37         | 642.87         |
| K  | 1  | 74.06         | 65.56          | 65.06          | 14 | <u>729.92</u> | <u>721.42</u>  | <u>720.92</u>  | <u>715.92</u> | <u>707.42</u>  | <u>706.92</u>  |

## D. RRC03108 (2501)

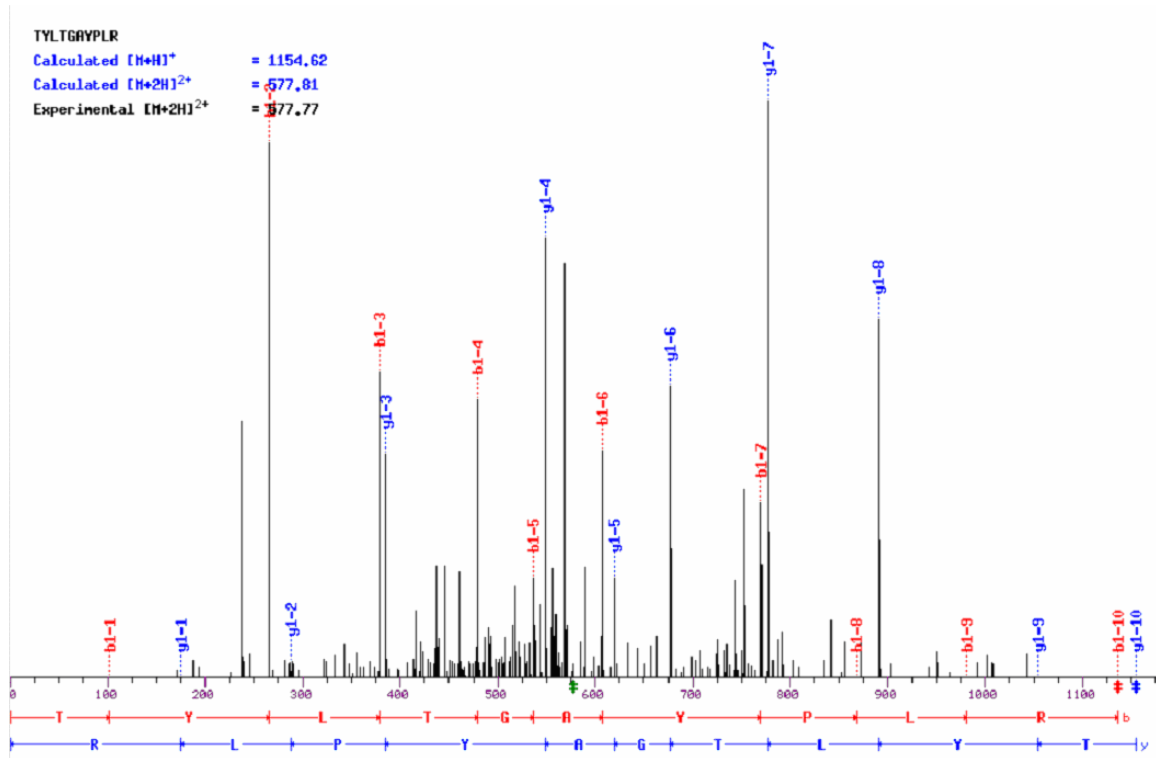

**Header:** rrc03108, ZINC PROTEASE (EC 3.4.99.-) 604457:605770 forward MW:46696

**Avg Mass:** 46696.1

**Coverage:** 10/438 = 2.3% by amino acid count, 1154.3/46696.1 = 2.5% by mass

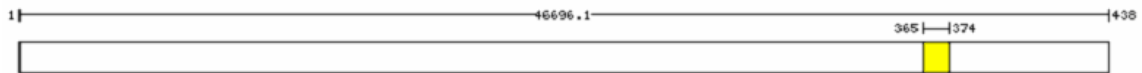

MILRAPFRIL AAVVLAVLSA LPAAAIEITE VTSPGGIKAW LVEAHDIPFT ALEIRFRGGA SLDEPGKRG TNLMTATLEE GSADLDSQGF  
 AAAQEALAA S FKFDVDDDTL SISARMLTEN RDKAVDLLRG ALIDPHFDQA SVDVRGQVL SIIASETQDP QALAGEAFRK LAYGDHPYGT  
 SLNGTLDSVQ ALTREDMFTA KARVMARDRL VVSAVGDITA ADLGPLLDR LGLDPATGAP LPPRADLALT GGVTVPFDT PQATVIFGEQ  
 GLAMSDPDDFF PAYVFNEILG AGGFSSRLME EVREKRLTY GIYYTLVPKD LAETWQGSFA SANGKVAEAI EIVKAEWARA ASGKVTIDREL  
 ADAK**TYLTGA** **YPLR**FDGNNG IADILAGMQL NGLPVDYINT RNDKVTAVTK DDIARVAQRL IKAEGLRFFV VGQPEGLK

Sort by:

Sequence

Position

**PepStat**

TYLTGAYPLR

365 - 374

TYLTGAYPLR

Calculated [M+H]<sup>+</sup> 1154.62

Calculated [M+2H]<sup>2+</sup> 577.81

Experimental [M+2H]<sup>2+</sup> 577.77

| I+ | #  | y              | y*            | y°            | #  | b              | b*             | b°             | a              | a*            | a°            | Pro    |
|----|----|----------------|---------------|---------------|----|----------------|----------------|----------------|----------------|---------------|---------------|--------|
| T  | 10 | <u>1154.62</u> | 1137.62       | 1136.62       | 1  | 102.06         | 85.06          | 84.06          | 74.06          | 57.06         | 56.06         |        |
| Y  | 9  | <u>1053.57</u> | 1036.57       | 1035.57       | 2  | <u>265.12</u>  | 248.12         | 247.12         | <u>237.12</u>  | 220.12        | 219.12        |        |
| L  | 8  | <u>890.51</u>  | <u>873.51</u> | <u>872.51</u> | 3  | <u>378.20</u>  | 361.20         | 360.20         | <u>350.21</u>  | <u>333.21</u> | 332.21        |        |
| T  | 7  | <u>777.43</u>  | 760.43        | 759.43        | 4  | <u>479.25</u>  | <u>462.25</u>  | <u>461.25</u>  | <u>451.26</u>  | 434.26        | 433.26        |        |
| G  | 6  | <u>676.38</u>  | 659.38        | 658.38        | 5  | <u>536.27</u>  | <u>519.27</u>  | <u>518.27</u>  | <u>508.28</u>  | <u>491.28</u> | <u>490.28</u> |        |
| A  | 5  | <u>619.36</u>  | 602.36        | 601.36        | 6  | <u>607.31</u>  | <u>590.31</u>  | <u>589.31</u>  | <u>579.31</u>  | 562.31        | <u>561.31</u> |        |
| Y  | 4  | <u>548.32</u>  | 531.32        | 530.32        | 7  | <u>770.37</u>  | <u>753.37</u>  | <u>752.37</u>  | <u>742.38</u>  | <u>725.38</u> | <u>724.38</u> |        |
| P  | 3  | <u>385.26</u>  | 368.26        | 367.26        | 8  | <u>867.43</u>  | 850.43         | 849.43         | <u>839.43</u>  | 822.43        | 821.43        | 98.06  |
| L  | 2  | <u>288.20</u>  | 271.20        | 270.20        | 9  | <u>980.51</u>  | <u>963.51</u>  | <u>962.51</u>  | <u>952.51</u>  | 935.51        | 934.51        | 211.14 |
| R  | 1  | <u>175.12</u>  | 158.12        | 157.12        | 10 | <u>1136.61</u> | <u>1119.61</u> | <u>1118.61</u> | <u>1108.62</u> | 1091.62       | 1090.62       | 367.25 |

| 2+ | #  | y             | y*            | y°            | #  | b             | b*            | b°            | a             | a*            | a°            | Pro    |
|----|----|---------------|---------------|---------------|----|---------------|---------------|---------------|---------------|---------------|---------------|--------|
| T  | 10 | <u>577.81</u> | <u>569.31</u> | <u>568.81</u> | 1  | 51.53         | 43.03         | 42.53         | 37.53         | 29.03         | 28.53         |        |
| Y  | 9  | <u>527.29</u> | <u>518.79</u> | <u>518.29</u> | 2  | 133.06        | 124.56        | 124.06        | 119.07        | 110.57        | 110.07        |        |
| L  | 8  | <u>445.76</u> | <u>437.26</u> | <u>436.76</u> | 3  | <u>189.61</u> | 181.11        | 180.61        | <u>175.61</u> | 167.11        | 166.61        |        |
| T  | 7  | <u>389.22</u> | 380.72        | <u>380.22</u> | 4  | <u>240.13</u> | 231.63        | 231.13        | <u>226.13</u> | 217.63        | 217.13        |        |
| G  | 6  | <u>338.69</u> | 330.19        | 329.69        | 5  | <u>268.64</u> | 260.14        | 259.64        | <u>254.64</u> | <u>246.14</u> | <u>245.64</u> |        |
| A  | 5  | <u>310.18</u> | 301.68        | 301.18        | 6  | <u>304.16</u> | 295.66        | <u>295.16</u> | <u>290.16</u> | <u>281.66</u> | <u>281.16</u> |        |
| Y  | 4  | <u>274.66</u> | <u>266.16</u> | <u>265.66</u> | 7  | <u>385.69</u> | <u>377.19</u> | 376.69        | <u>371.69</u> | 363.19        | 362.69        |        |
| P  | 3  | <u>193.13</u> | 184.63        | 184.13        | 8  | <u>434.22</u> | 425.72        | 425.22        | <u>420.22</u> | 411.72        | 411.22        | 49.53  |
| L  | 2  | 144.61        | 136.11        | 135.61        | 9  | <u>490.76</u> | 482.26        | 481.76        | <u>476.76</u> | 468.26        | 467.76        | 106.08 |
| R  | 1  | 88.06         | 79.56         | 79.06         | 10 | <u>568.81</u> | <u>560.31</u> | <u>559.81</u> | <u>554.81</u> | 546.31        | 545.81        | 184.13 |

-----

# E. RRC03108 (2501)

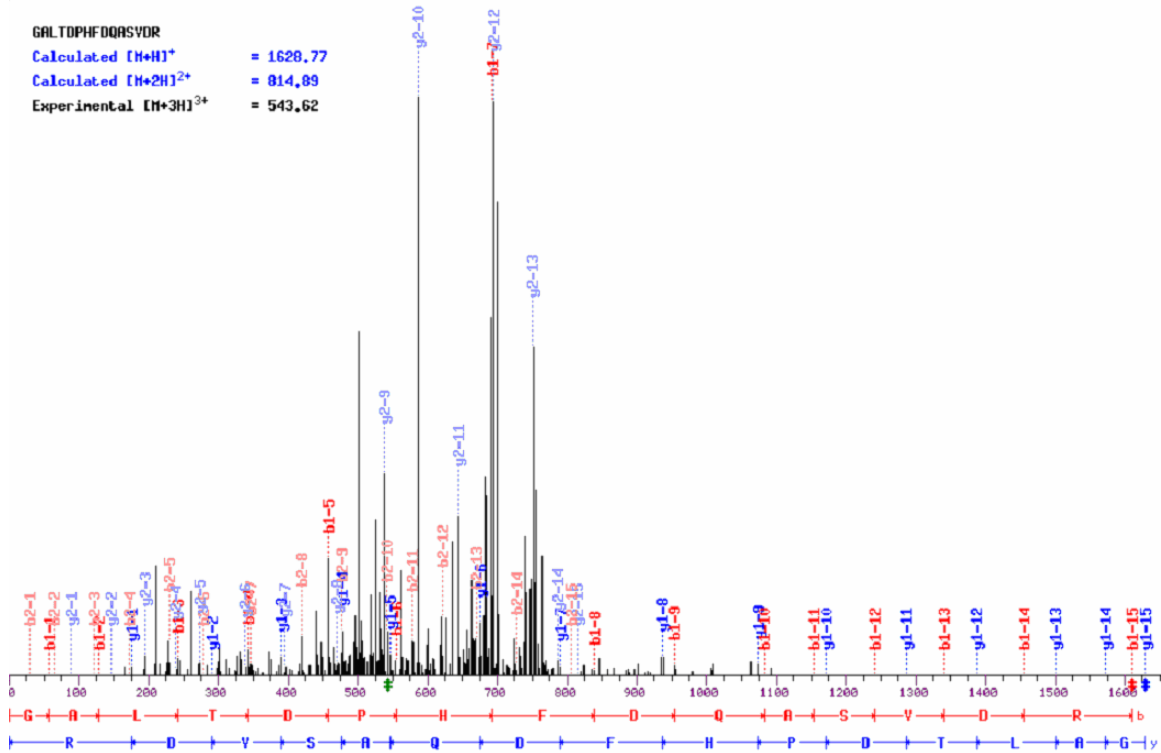

**Header:** rrc03108, ZINC PROTEASE (EC 3.4.99.-) 604457:605770 forward MW:46696  
**Avg Mass:** 46696.1 **Coverage:** 15/438 = 3.4% by amino acid count, 1628.7/46696.1 = 3.5% by mass

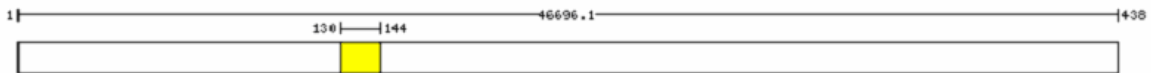

MILRAPFRIL AAVVLAVLSA LPAAAEITE VTSPGGIKAW LVEAHDIPT ALEIRFRGGA SLDEPKRGA TNLMTATLEE GSADLDSQGF  
 AAAQEALAAAS FKFDVDDTL SISARMLTEN RDKAVDLLRG **ALDTPHFQASVDR**VRGQVL SIIASETQDP QALAGEAFRK LAYGDHPYGT  
 SLNGTLDVSVQ ALTREDMFTA KARVMARDRL VVSAVGDITA ADLGPLLDRL LGDLPATGAP LPPRADLALT GCVIVVPPDT PQATVIFGEQ  
 GLAMSDPDFF PAYVFNEILG ACGFSSRLME EVREKRGLTY GIYTYLVPKD LAETWQGSFA SANGKVAEAI EIVKAENARA ASGKVTDREL  
 ADAKTYLTGA YPLRFDGNGN IADILAGMQL NGLPVDYINT RMDKVTAVIK DDIAARVAQRL IKAEGLRFFV VQQPEGLK

**Sort by:** Sequence  Position   
**PepStat** GALDTPHFQASVDR 130 - 144



## GALTDPHFDQASVDR

Calculated [M+H]<sup>+</sup> 1628.77Calculated [M+2H]<sup>2+</sup> 814.89Experimental [M+3H]<sup>3+</sup> 543.62

| l+ | #  | y              | y <sup>+</sup> | y <sup>o</sup> | #  | b              | b <sup>+</sup> | b <sup>o</sup> | a              | a <sup>+</sup> | a <sup>o</sup> | Pro           | His           |
|----|----|----------------|----------------|----------------|----|----------------|----------------|----------------|----------------|----------------|----------------|---------------|---------------|
| G  | 15 | 1628.77        | 1611.77        | 1610.77        | 1  | 58.03          | 41.03          | 40.03          | 30.03          | 13.03          | 12.03          |               |               |
| A  | 14 | 1571.75        | 1554.75        | 1553.75        | 2  | 129.07         | 112.07         | 111.07         | 101.07         | 84.07          | 83.07          |               |               |
| L  | 13 | 1500.71        | 1483.71        | 1482.71        | 3  | <u>242.15</u>  | <u>225.15</u>  | <u>224.15</u>  | <u>214.16</u>  | 197.16         | <u>196.16</u>  |               |               |
| T  | 12 | 1387.62        | 1370.62        | 1369.62        | 4  | <u>343.20</u>  | <u>326.20</u>  | <u>325.20</u>  | <u>315.20</u>  | <u>298.20</u>  | 297.20         |               |               |
| D  | 11 | 1286.58        | 1269.58        | 1268.58        | 5  | <u>458.23</u>  | <u>441.23</u>  | <u>440.23</u>  | <u>430.23</u>  | 413.23         | 412.23         |               |               |
| P  | 10 | 1171.55        | 1154.55        | 1153.55        | 6  | <u>555.28</u>  | <u>538.28</u>  | <u>537.28</u>  | <u>527.28</u>  | 510.28         | 509.28         | 98.06         |               |
| H  | 9  | <u>1074.50</u> | 1057.50        | 1056.50        | 7  | <u>692.34</u>  | 675.34         | 674.34         | <u>664.34</u>  | 647.34         | 646.34         | 235.12        | 138.07        |
| F  | 8  | <u>937.44</u>  | 920.44         | 919.44         | 8  | <u>839.41</u>  | 822.41         | 821.41         | <u>811.41</u>  | 794.41         | 793.41         | 382.19        | 285.14        |
| D  | 7  | <u>790.37</u>  | 773.37         | 772.37         | 9  | <u>954.43</u>  | <u>937.43</u>  | <u>936.43</u>  | <u>926.44</u>  | 909.44         | 908.44         | <u>497.21</u> | 400.16        |
| Q  | 6  | <u>675.34</u>  | 658.34         | 657.34         | 10 | <u>1082.49</u> | 1065.49        | <u>1064.49</u> | <u>1054.50</u> | 1037.50        | 1036.50        | 625.27        | <u>528.22</u> |
| A  | 5  | <u>547.28</u>  | <u>530.28</u>  | <u>529.28</u>  | 11 | <u>1153.53</u> | 1136.53        | 1135.53        | <u>1125.53</u> | 1108.53        | 1107.53        | <u>696.31</u> | <u>599.26</u> |
| S  | 4  | <u>476.25</u>  | <u>459.25</u>  | <u>458.25</u>  | 12 | <u>1240.56</u> | 1223.56        | 1222.56        | <u>1212.56</u> | 1195.56        | 1194.56        | 783.34        | 686.29        |
| V  | 3  | <u>389.21</u>  | <u>372.21</u>  | <u>371.21</u>  | 13 | <u>1339.63</u> | 1322.63        | 1321.63        | <u>1311.63</u> | 1294.63        | 1293.63        | 882.41        | 785.36        |
| D  | 2  | <u>290.15</u>  | <u>273.15</u>  | <u>272.15</u>  | 14 | <u>1454.66</u> | 1437.66        | 1436.66        | <u>1426.66</u> | 1409.66        | 1408.66        | 997.44        | <u>900.39</u> |
| R  | 1  | <u>175.12</u>  | 158.12         | 157.12         | 15 | <u>1610.76</u> | 1593.76        | 1592.76        | <u>1582.76</u> | 1565.76        | 1564.76        | 1153.54       | 1056.49       |

| 2+ | #  | y             | y <sup>+</sup> | y <sup>o</sup> | #  | b             | b <sup>+</sup> | b <sup>o</sup> | a             | a <sup>+</sup> | a <sup>o</sup> | Pro           | His           |
|----|----|---------------|----------------|----------------|----|---------------|----------------|----------------|---------------|----------------|----------------|---------------|---------------|
| G  | 15 | 814.89        | 806.39         | 805.89         | 1  | 29.52         | 21.02          | 20.52          | 15.52         | 7.02           | 6.52           |               |               |
| A  | 14 | <u>786.38</u> | 777.88         | 777.38         | 2  | 65.04         | 56.54          | 56.04          | 51.04         | 42.54          | 42.04          |               |               |
| L  | 13 | <u>750.86</u> | 742.36         | 741.86         | 3  | 121.58        | 113.08         | 112.58         | 107.58        | 99.08          | 98.58          |               |               |
| T  | 12 | <u>694.32</u> | 685.82         | 685.32         | 4  | <u>172.10</u> | 163.60         | 163.10         | 158.11        | 149.61         | 149.11         |               |               |
| D  | 11 | <u>643.79</u> | <u>635.29</u>  | 634.79         | 5  | <u>229.62</u> | 221.12         | 220.62         | <u>215.62</u> | 207.12         | 206.62         |               |               |
| P  | 10 | <u>586.28</u> | 577.78         | 577.28         | 6  | <u>278.14</u> | 269.64         | 269.14         | <u>264.15</u> | 255.65         | 255.15         | 49.53         |               |
| H  | 9  | <u>537.75</u> | <u>529.25</u>  | <u>528.75</u>  | 7  | <u>346.67</u> | 338.17         | 337.67         | <u>332.67</u> | 324.17         | 323.67         | 118.06        | 69.54         |
| F  | 8  | <u>469.22</u> | 460.72         | 460.22         | 8  | <u>420.21</u> | 411.71         | 411.21         | <u>406.21</u> | 397.71         | 397.21         | 191.60        | 143.07        |
| D  | 7  | <u>395.69</u> | 387.19         | 386.69         | 9  | <u>477.72</u> | 469.22         | 468.72         | <u>463.72</u> | 455.22         | 454.72         | 249.11        | 200.58        |
| Q  | 6  | <u>338.18</u> | <u>329.68</u>  | <u>329.18</u>  | 10 | <u>541.75</u> | <u>533.25</u>  | <u>532.75</u>  | <u>527.75</u> | <u>519.25</u>  | <u>518.75</u>  | <u>313.14</u> | <u>264.61</u> |
| A  | 5  | <u>274.15</u> | 265.65         | 265.15         | 11 | <u>577.27</u> | 568.77         | 568.27         | <u>563.27</u> | 554.77         | 554.27         | <u>348.66</u> | <u>300.13</u> |
| S  | 4  | <u>238.63</u> | <u>230.13</u>  | <u>229.63</u>  | 12 | <u>620.78</u> | 612.28         | 611.78         | <u>606.79</u> | 598.29         | 597.79         | 392.18        | <u>343.65</u> |
| V  | 3  | <u>195.11</u> | 186.61         | 186.11         | 13 | <u>670.32</u> | 661.82         | 661.32         | <u>656.32</u> | 647.82         | 647.32         | <u>441.71</u> | 393.18        |
| D  | 2  | 145.58        | 137.08         | 136.58         | 14 | <u>727.83</u> | 719.33         | 718.83         | <u>713.83</u> | 705.33         | 704.83         | <u>499.22</u> | 450.70        |
| R  | 1  | 88.06         | 79.56          | 79.06          | 15 | <u>805.88</u> | 797.38         | 796.88         | <u>791.88</u> | 783.38         | 782.88         | 577.27        | <u>528.75</u> |

| 3+ | #  | y             | y <sup>+</sup> | y <sup>o</sup> | #  | b             | b <sup>+</sup> | b <sup>o</sup> | a             | a <sup>+</sup> | a <sup>o</sup> | Pro           | His           |
|----|----|---------------|----------------|----------------|----|---------------|----------------|----------------|---------------|----------------|----------------|---------------|---------------|
| G  | 15 | 543.59        | 537.93         | 537.59         | 1  | 20.01         | 14.35          | 14.01          | 10.68         | 5.02           | 4.68           |               |               |
| A  | 14 | <u>524.59</u> | <u>518.92</u>  | <u>518.59</u>  | 2  | 43.69         | 38.03          | 37.69          | 34.36         | 28.70          | 28.36          |               |               |
| L  | 13 | <u>500.91</u> | <u>495.24</u>  | <u>494.91</u>  | 3  | 81.39         | 75.72          | 75.39          | 72.06         | 66.39          | 66.06          |               |               |
| T  | 12 | <u>463.21</u> | 457.55         | 457.21         | 4  | 115.07        | 109.40         | 109.07         | 105.74        | 100.07         | 99.74          |               |               |
| D  | 11 | <u>429.53</u> | 423.86         | 423.53         | 5  | 153.41        | 147.75         | 147.41         | 144.08        | 138.42         | 138.08         |               |               |
| P  | 10 | <u>391.19</u> | 385.52         | 385.19         | 6  | <u>185.76</u> | 180.10         | 179.76         | <u>176.43</u> | 170.77         | 170.43         | 33.36         |               |
| H  | 9  | <u>358.84</u> | 353.17         | 352.84         | 7  | <u>231.45</u> | <u>225.78</u>  | <u>225.45</u>  | <u>222.12</u> | 216.45         | 216.12         | 79.05         | 46.69         |
| F  | 8  | <u>313.15</u> | 307.48         | 307.15         | 8  | <u>280.47</u> | 274.81         | 274.47         | <u>271.14</u> | 265.48         | 265.14         | 128.07        | 95.72         |
| D  | 7  | <u>264.13</u> | 258.46         | 258.13         | 9  | <u>318.82</u> | <u>313.15</u>  | <u>312.82</u>  | <u>309.48</u> | 303.82         | 303.48         | <u>166.41</u> | 134.06        |
| Q  | 6  | <u>225.79</u> | 220.12         | 219.79         | 10 | <u>361.50</u> | <u>355.84</u>  | <u>355.50</u>  | <u>352.17</u> | <u>346.50</u>  | <u>346.17</u>  | <u>209.10</u> | 176.75        |
| A  | 5  | <u>183.10</u> | 177.43         | 177.10         | 11 | <u>385.18</u> | 379.51         | 379.18         | <u>375.85</u> | 370.18         | 369.85         | 232.78        | 200.42        |
| S  | 4  | 159.42        | 153.75         | 153.42         | 12 | <u>414.19</u> | 408.53         | 408.19         | <u>404.86</u> | 399.19         | 398.86         | <u>261.79</u> | <u>229.44</u> |
| V  | 3  | 130.41        | 124.74         | 124.41         | 13 | <u>447.21</u> | <u>441.55</u>  | <u>441.21</u>  | <u>437.88</u> | 432.22         | 431.88         | 294.81        | <u>262.46</u> |
| D  | 2  | 97.39         | 91.72          | 91.39          | 14 | <u>485.56</u> | 479.89         | 479.56         | <u>476.23</u> | 470.56         | 470.23         | <u>333.15</u> | <u>300.80</u> |
| R  | 1  | 59.05         | 53.38          | 53.05          | 15 | <u>537.59</u> | <u>531.92</u>  | <u>531.59</u>  | <u>528.26</u> | 522.59         | 522.26         | 385.18        | 352.83        |

# F. RRC04139 (1004)

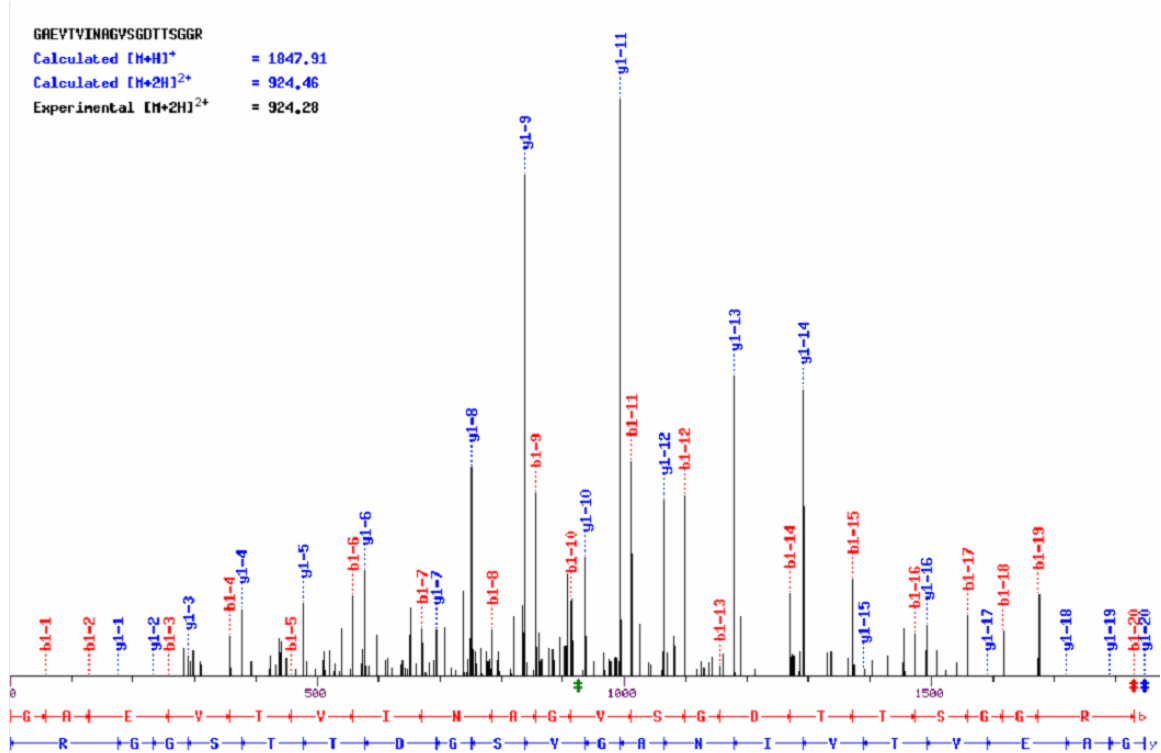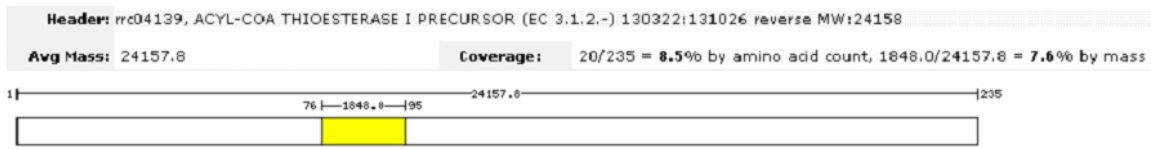

MSVINACLQR GSTGYGVRRR LKKAALAGIF ALGIGCGAAA EPVTLAVGD SLTQCYGLDP DQGLVPQLQG WLRTR**GAEVT VINAGVSGDT**  
**TSSGR**ARLGG SLTPEIDAVM IALGGNDMLR GQPPAQARAN LDAMLSEVTA RDLFVALVGL KAPGNYGPDW QAGYDAIUPE LGAKYGAVVV  
 PDLLAFIAAK TPEARAAEGL MQADNIHPSA RGVGLVVDAL GPKVLELLER VKPAP

Sort by:  Sequence  Position  
[PepStat](#) GAEVTVINAGVSGDTTSSGR 76 - 95

GAEVTVINAGVSGDITSGGR

Calculated [M+H]<sup>+</sup> 1847.91

Calculated [M+2H]<sup>2+</sup> 924.46

Experimental [M+2H]<sup>2+</sup> 924.28

| l+ | #  | y              | y*             | y°             | #  | b              | b*             | b°             | a              | a*            | a°            |
|----|----|----------------|----------------|----------------|----|----------------|----------------|----------------|----------------|---------------|---------------|
| G  | 20 | <b>1847.91</b> | 1830.91        | 1829.91        | 1  | 58.03          | 41.03          | 40.03          | 30.03          | 13.03         | 12.03         |
| A  | 19 | <b>1790.89</b> | 1773.89        | 1772.89        | 2  | 129.07         | 112.07         | 111.07         | 101.07         | 84.07         | 83.07         |
| E  | 18 | <b>1719.85</b> | 1702.85        | 1701.85        | 3  | 258.11         | 241.11         | 240.11         | 230.11         | 213.11        | 212.11        |
| V  | 17 | <b>1590.81</b> | 1573.81        | 1572.81        | 4  | <b>357.18</b>  | <b>340.18</b>  | <b>339.18</b>  | <b>329.18</b>  | <b>312.18</b> | <b>311.18</b> |
| T  | 16 | <b>1491.74</b> | 1474.74        | <b>1473.74</b> | 5  | <b>458.23</b>  | <b>441.23</b>  | <b>440.23</b>  | <b>430.23</b>  | 413.23        | 412.23        |
| V  | 15 | <b>1390.69</b> | <b>1373.69</b> | <b>1372.69</b> | 6  | <b>557.29</b>  | <b>540.29</b>  | <b>539.29</b>  | <b>529.30</b>  | <b>512.30</b> | <b>511.30</b> |
| I  | 14 | <b>1291.62</b> | <b>1274.62</b> | <b>1273.62</b> | 7  | <b>670.38</b>  | <b>653.38</b>  | <b>652.38</b>  | <b>642.38</b>  | 625.38        | 624.38        |
| N  | 13 | <b>1178.54</b> | <b>1161.54</b> | <b>1160.54</b> | 8  | <b>784.42</b>  | <b>767.42</b>  | <b>766.42</b>  | <b>756.43</b>  | 739.43        | <b>738.43</b> |
| A  | 12 | <b>1064.50</b> | 1047.50        | 1046.50        | 9  | <b>855.46</b>  | <b>838.46</b>  | <b>837.46</b>  | <b>827.46</b>  | 810.46        | 809.46        |
| G  | 11 | <b>993.46</b>  | <b>976.46</b>  | <b>975.46</b>  | 10 | <b>912.48</b>  | <b>895.48</b>  | <b>894.48</b>  | <b>884.48</b>  | 867.48        | 866.48        |
| V  | 10 | <b>936.44</b>  | 919.44         | 918.44         | 11 | <b>1011.55</b> | <b>994.55</b>  | <b>993.55</b>  | <b>983.55</b>  | 966.55        | 965.55        |
| S  | 9  | <b>837.37</b>  | <b>820.37</b>  | 819.37         | 12 | <b>1098.58</b> | <b>1081.58</b> | <b>1080.58</b> | <b>1070.58</b> | 1053.58       | 1052.58       |
| G  | 8  | <b>750.34</b>  | 733.34         | 732.34         | 13 | <b>1155.60</b> | 1138.60        | 1137.60        | <b>1127.61</b> | 1110.61       | 1109.61       |
| D  | 7  | <b>693.32</b>  | 676.32         | 675.32         | 14 | <b>1270.63</b> | 1253.63        | 1252.63        | <b>1242.63</b> | 1225.63       | 1224.63       |
| T  | 6  | <b>578.29</b>  | 561.29         | 560.29         | 15 | <b>1371.68</b> | 1354.68        | 1353.68        | <b>1343.68</b> | 1326.68       | 1325.68       |
| T  | 5  | <b>477.24</b>  | 460.24         | 459.24         | 16 | <b>1472.72</b> | <b>1455.72</b> | <b>1454.72</b> | <b>1444.73</b> | 1427.73       | 1426.73       |
| S  | 4  | <b>376.19</b>  | 359.19         | <b>358.19</b>  | 17 | <b>1559.76</b> | 1542.76        | 1541.76        | <b>1531.76</b> | 1514.76       | 1513.76       |
| G  | 3  | <b>289.16</b>  | 272.16         | 271.16         | 18 | <b>1616.78</b> | 1599.78        | 1598.78        | <b>1588.78</b> | 1571.78       | 1570.78       |
| G  | 2  | 232.14         | 215.14         | 214.14         | 19 | <b>1673.80</b> | 1656.80        | 1655.80        | <b>1645.80</b> | 1628.80       | 1627.80       |
| R  | 1  | 175.12         | 158.12         | 157.12         | 20 | <b>1829.90</b> | 1812.90        | 1811.90        | <b>1801.90</b> | 1784.90       | 1783.90       |

| 2+ | #  | y             | y*            | y°            | #  | b             | b*            | b°            | a             | a*            | a°            |
|----|----|---------------|---------------|---------------|----|---------------|---------------|---------------|---------------|---------------|---------------|
| G  | 20 | <u>924.46</u> | <u>915.96</u> | <u>915.46</u> | 1  | 29.52         | 21.02         | 20.52         | 15.52         | 7.02          | 6.52          |
| A  | 19 | <u>895.95</u> | 887.45        | 886.95        | 2  | 65.04         | 56.54         | 56.04         | 51.04         | 42.54         | 42.04         |
| E  | 18 | <u>860.43</u> | 851.93        | 851.43        | 3  | 129.56        | 121.06        | 120.56        | 115.56        | 107.06        | 106.56        |
| V  | 17 | <u>795.91</u> | 787.41        | 786.91        | 4  | 179.09        | 170.59        | 170.09        | 165.10        | 156.60        | 156.10        |
| T  | 16 | <u>746.37</u> | <u>737.87</u> | <u>737.37</u> | 5  | 229.62        | 221.12        | 220.62        | 215.62        | 207.12        | 206.62        |
| V  | 15 | <u>695.85</u> | 687.35        | 686.85        | 6  | 279.15        | 270.65        | 270.15        | 265.15        | 256.65        | 256.15        |
| I  | 14 | <u>646.32</u> | <u>637.82</u> | <u>637.32</u> | 7  | <u>335.69</u> | <u>327.19</u> | <u>326.69</u> | <u>321.70</u> | 313.20        | 312.70        |
| N  | 13 | <u>589.77</u> | 581.27        | 580.77        | 8  | <u>392.71</u> | <u>384.21</u> | <u>383.71</u> | <u>378.72</u> | 370.22        | 369.72        |
| A  | 12 | <u>532.75</u> | 524.25        | 523.75        | 9  | <u>428.23</u> | <u>419.73</u> | <u>419.23</u> | <u>414.24</u> | 405.74        | 405.24        |
| G  | 11 | <u>497.23</u> | 488.73        | 488.23        | 10 | <u>456.74</u> | <u>448.24</u> | <u>447.74</u> | <u>442.75</u> | 434.25        | 433.75        |
| V  | 10 | <u>468.72</u> | 460.22        | 459.72        | 11 | <u>506.28</u> | <u>497.78</u> | <u>497.28</u> | <u>492.28</u> | 483.78        | 483.28        |
| S  | 9  | <u>419.19</u> | 410.69        | 410.19        | 12 | <u>549.79</u> | <u>541.29</u> | <u>540.79</u> | <u>535.80</u> | 527.30        | 526.80        |
| G  | 8  | <u>375.67</u> | 367.17        | 366.67        | 13 | <u>578.30</u> | <u>569.80</u> | <u>569.30</u> | <u>564.31</u> | <u>555.81</u> | 555.31        |
| D  | 7  | <u>347.16</u> | 338.66        | 338.16        | 14 | <u>635.82</u> | <u>627.32</u> | <u>626.82</u> | <u>621.82</u> | 613.32        | 612.82        |
| T  | 6  | <u>289.65</u> | 281.15        | 280.65        | 15 | <u>686.34</u> | <u>677.84</u> | <u>677.34</u> | <u>672.34</u> | 663.84        | 663.34        |
| T  | 5  | 239.13        | 230.63        | 230.13        | 16 | <u>736.87</u> | <u>728.37</u> | <u>727.87</u> | <u>722.87</u> | 714.37        | 713.87        |
| S  | 4  | 188.60        | 180.10        | 179.60        | 17 | <u>780.38</u> | <u>771.88</u> | <u>771.38</u> | <u>766.38</u> | <u>757.88</u> | <u>757.38</u> |
| G  | 3  | 145.09        | 136.59        | 136.09        | 18 | <u>808.89</u> | <u>800.39</u> | <u>799.89</u> | <u>794.89</u> | <u>786.39</u> | <u>785.89</u> |
| G  | 2  | 116.57        | 108.07        | 107.57        | 19 | <u>837.40</u> | <u>828.90</u> | <u>828.40</u> | <u>823.41</u> | 814.91        | 814.41        |
| R  | 1  | 88.06         | 79.56         | 79.06         | 20 | <u>915.45</u> | <u>906.95</u> | <u>906.45</u> | <u>901.46</u> | 892.96        | 892.46        |

# G. RRC04139 (1004)

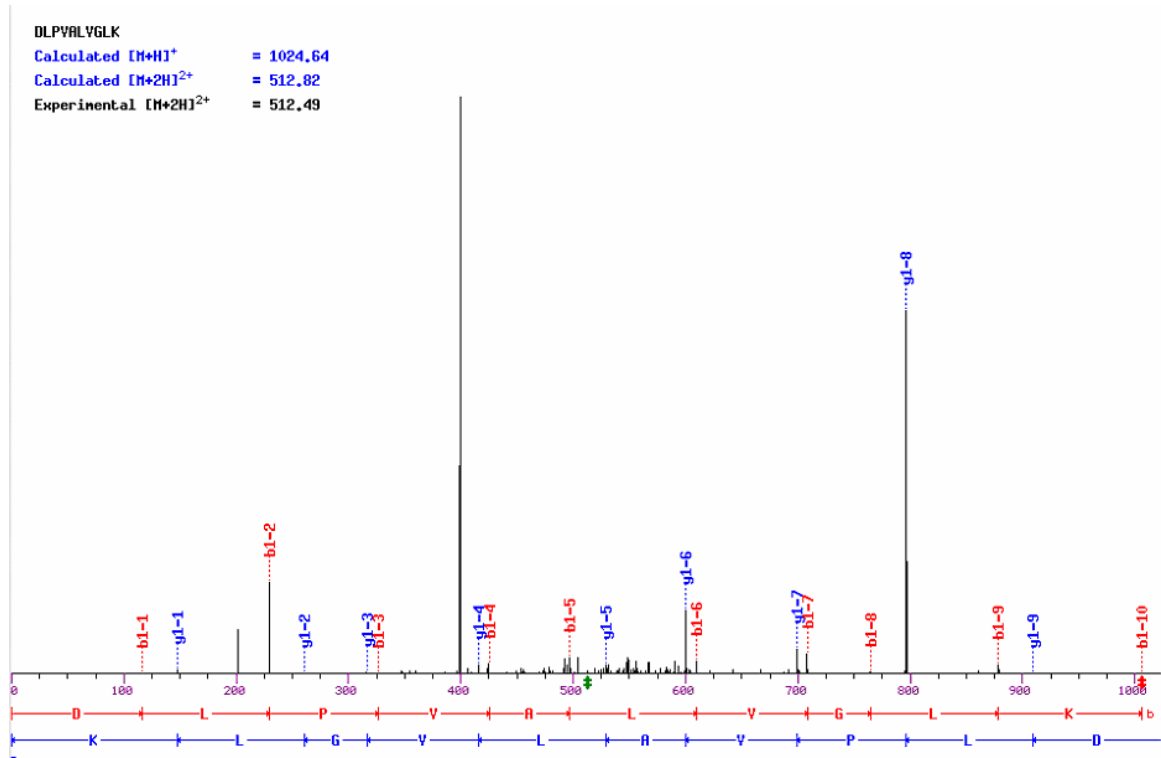

**Header:** rrc04139, ACYL-COA THIOESTERASE I PRECURSOR (EC 3.1.2.-) 130322:131026 reverse MW:24158  
**Avg Mass:** 24157.8 **Coverage:** 7/235 = 3.0% by amino acid count, 871.0/24157.8 = 3.6% by mass

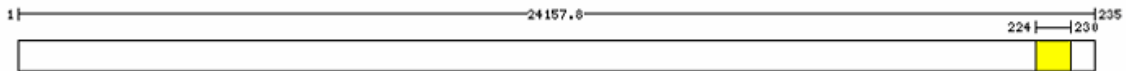

MSVIWAQLQR GSTGYGVRRL LGKAALAGIF ALGIGGGAAA EPVTLAVGD SLTQGYGLDP DQGLVPQLQG WLRTRGA EVT VINAGVSGDT  
 TSGGRARLQW SLTPEIDAVM IALGGNDMLR GPPAQARAN LDAMLSEVTA RDLPVALVGL KAPGNYGPDW QAGYDAIWPE LGAKYGAVV  
 PDLLAPIAAK TPEARAAEGL MQADNIHPSA RGVGLVVDAL GPK**VLELLER** VKPAP

Sort by:  Sequence  Position  
 PepStat **VLELLER** 224 - 230

DLPVALVGLK

Calculated [M+H]<sup>+</sup> 1024.64

Calculated [M+2H]<sup>2+</sup> 512.82

Experimental [M+2H]<sup>2+</sup> 512.49

| 1+ | #  | y              | y*      | y°      | #  | b              | b*            | b°            | a             | a*     | a°     | Pro    |
|----|----|----------------|---------|---------|----|----------------|---------------|---------------|---------------|--------|--------|--------|
| D  | 10 | <u>1024.64</u> | 1007.64 | 1006.64 | 1  | 116.03         | 99.03         | 98.03         | 88.04         | 71.04  | 70.04  |        |
| L  | 9  | <u>909.61</u>  | 892.61  | 891.61  | 2  | <u>229.12</u>  | <u>212.12</u> | <u>211.12</u> | <u>201.12</u> | 184.12 | 183.12 |        |
| P  | 8  | <u>796.53</u>  | 779.53  | 778.53  | 3  | <u>326.17</u>  | 309.17        | 308.17        | <u>298.18</u> | 281.18 | 280.18 | 98.06  |
| V  | 7  | <u>699.48</u>  | 682.48  | 681.48  | 4  | <u>425.24</u>  | 408.24        | <u>407.24</u> | <u>397.25</u> | 380.25 | 379.25 | 197.13 |
| A  | 6  | <u>600.41</u>  | 583.41  | 582.41  | 5  | <u>496.28</u>  | 479.28        | <u>478.28</u> | <u>468.28</u> | 451.28 | 450.28 | 268.17 |
| L  | 5  | <u>529.37</u>  | 512.37  | 511.37  | 6  | <u>609.36</u>  | 592.36        | 591.36        | <u>581.37</u> | 564.37 | 563.37 | 381.25 |
| V  | 4  | <u>416.29</u>  | 399.29  | 398.29  | 7  | <u>708.43</u>  | 691.43        | <u>690.43</u> | <u>680.43</u> | 663.43 | 662.43 | 480.32 |
| G  | 3  | <u>317.22</u>  | 300.22  | 299.22  | 8  | <u>765.45</u>  | 748.45        | 747.45        | <u>737.46</u> | 720.46 | 719.46 | 537.34 |
| L  | 2  | <u>260.20</u>  | 243.20  | 242.20  | 9  | <u>878.54</u>  | 861.54        | <u>860.54</u> | <u>850.54</u> | 833.54 | 832.54 | 650.42 |
| K  | 1  | <u>147.11</u>  | 130.11  | 129.11  | 10 | <u>1006.63</u> | 989.63        | 988.63        | <u>978.64</u> | 961.64 | 960.64 | 778.52 |

| 2+ | #  | y             | y*            | y°            | #  | b             | b*            | b°            | a             | a*            | a°            | Pro    |
|----|----|---------------|---------------|---------------|----|---------------|---------------|---------------|---------------|---------------|---------------|--------|
| D  | 10 | <u>512.82</u> | <u>504.32</u> | <u>503.82</u> | 1  | 58.52         | 50.02         | 49.52         | 44.52         | 36.02         | 35.52         |        |
| L  | 9  | <u>455.31</u> | 446.81        | 446.31        | 2  | 115.06        | 106.56        | 106.06        | 101.07        | 92.57         | 92.07         |        |
| P  | 8  | <u>398.77</u> | 390.27        | 389.77        | 3  | <u>163.59</u> | 155.09        | 154.59        | <u>149.59</u> | 141.09        | 140.59        | 49.53  |
| V  | 7  | <u>350.24</u> | 341.74        | 341.24        | 4  | <u>213.12</u> | 204.62        | 204.12        | <u>199.13</u> | 190.63        | 190.13        | 99.07  |
| A  | 6  | <u>300.71</u> | 292.21        | 291.71        | 5  | <u>248.64</u> | 240.14        | 239.64        | <u>234.65</u> | 226.15        | 225.65        | 134.59 |
| L  | 5  | <u>265.19</u> | 256.69        | 256.19        | 6  | <u>305.18</u> | 296.68        | 296.18        | <u>291.19</u> | 282.69        | 282.19        | 191.13 |
| V  | 4  | <u>208.65</u> | <u>200.15</u> | <u>199.65</u> | 7  | <u>354.72</u> | <u>346.22</u> | <u>345.72</u> | <u>340.72</u> | 332.22        | 331.72        | 240.66 |
| G  | 3  | <u>159.11</u> | 150.61        | 150.11        | 8  | <u>383.23</u> | 374.73        | 374.23        | <u>369.23</u> | 360.73        | 360.23        | 269.17 |
| L  | 2  | 130.60        | 122.10        | 121.60        | 9  | <u>439.77</u> | 431.27        | 430.77        | <u>425.77</u> | <u>417.27</u> | <u>416.77</u> | 325.72 |
| K  | 1  | 74.06         | 65.56         | 65.06         | 10 | <u>503.82</u> | <u>495.32</u> | <u>494.82</u> | <u>489.82</u> | 481.32        | 480.82        | 389.76 |

# H. RRC00485 (7003)

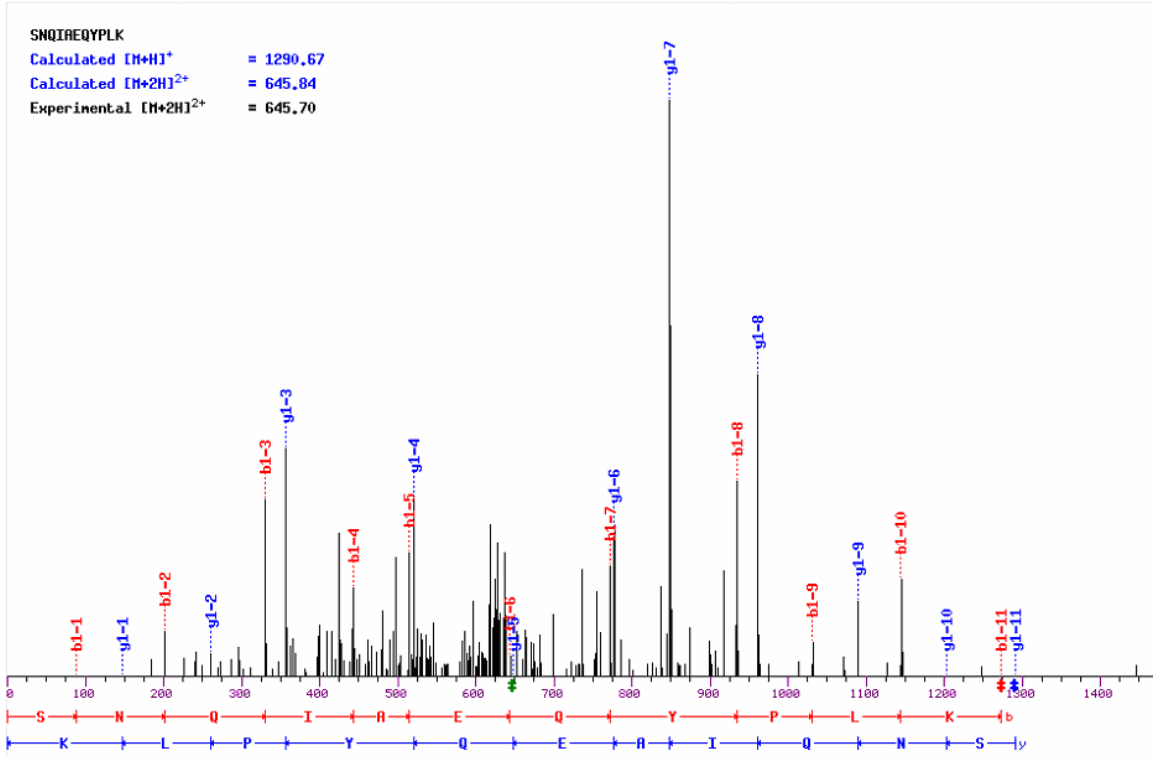

**Header:** rrc00485, OUTER MEMBRANE LIPOPROTEINS CARRIER PROTEIN PRECURSOR S 451709:452317 reverse MW:21974  
**Avg Mass:** 21974.4 **Coverage:** 11/203 = 5.4% by amino acid count, 1290.4/21974.4 = 5.9% by mass

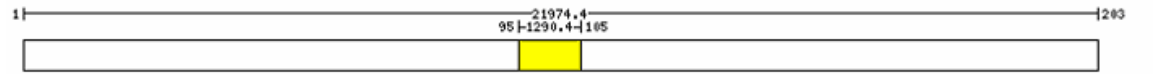

MIQMRFAPVA ALLPVLMLAL AAPAWAEKIP LAQLSAYLNG LTTAAEAFTQ VNADGSKSTG KLYLKRPGRM RFEYSDDDTL VLASGGQVAI  
 FDPKSNQIAE QYPLKRTPLN LILADRIDLA QARMVVGHEA EGANTAVVAQ DPQNPDYGTI RLVFSANPVT LRRWVITDDT GAKTVVILDQ  
 LKPGVDPGPL MFSIVAETEA RKN

Sort by:  Sequence  Position   
 PepStat  SNQIAEQYPLK  95 - 105

SNQIAEQYPLK

Calculated [M+H]<sup>+</sup> 1290.67

Calculated [M+2H]<sup>2+</sup> 645.84

Experimental [M+2H]<sup>2+</sup> 645.70

| 1+ # | y              | y*             | y°             | #  | b              | b*             | b°             | a              | a*            | a°            | Pro    |
|------|----------------|----------------|----------------|----|----------------|----------------|----------------|----------------|---------------|---------------|--------|
| S 11 | <u>1290.67</u> | 1273.67        | 1272.67        | 1  | 88.04          | 71.04          | 70.04          | 60.04          | 43.04         | 42.04         |        |
| N 10 | <u>1203.64</u> | 1186.64        | 1185.64        | 2  | <u>202.08</u>  | 185.08         | <u>184.08</u>  | 174.09         | 157.09        | 156.09        |        |
| Q 9  | <u>1089.59</u> | <u>1072.59</u> | <u>1071.59</u> | 3  | <u>330.14</u>  | 313.14         | <u>312.14</u>  | <u>302.15</u>  | 285.15        | 284.15        |        |
| I 8  | <u>961.54</u>  | 944.54         | 943.54         | 4  | <u>443.23</u>  | <u>426.23</u>  | <u>425.23</u>  | <u>415.23</u>  | <u>398.23</u> | <u>397.23</u> |        |
| A 7  | <u>848.45</u>  | 831.45         | 830.45         | 5  | <u>514.26</u>  | <u>497.26</u>  | <u>496.26</u>  | <u>486.27</u>  | 469.27        | 468.27        |        |
| E 6  | <u>777.41</u>  | <u>760.41</u>  | <u>759.41</u>  | 6  | <u>643.31</u>  | <u>626.31</u>  | <u>625.31</u>  | <u>615.31</u>  | 598.31        | 597.31        |        |
| Q 5  | <u>648.37</u>  | <u>631.37</u>  | <u>630.37</u>  | 7  | <u>771.36</u>  | <u>754.36</u>  | <u>753.36</u>  | <u>743.37</u>  | 726.37        | 725.37        |        |
| Y 4  | <u>520.31</u>  | 503.31         | 502.31         | 8  | <u>934.43</u>  | <u>917.43</u>  | <u>916.43</u>  | <u>906.43</u>  | 889.43        | 888.43        |        |
| P 3  | <u>357.25</u>  | 340.25         | 339.25         | 9  | <u>1031.48</u> | <u>1014.48</u> | <u>1013.48</u> | <u>1003.48</u> | 986.48        | 985.48        | 98.06  |
| L 2  | <u>260.20</u>  | 243.20         | <u>242.20</u>  | 10 | <u>1144.56</u> | 1127.56        | <u>1126.56</u> | <u>1116.57</u> | 1099.57       | 1098.57       | 211.14 |
| K 1  | 147.11         | 130.11         | 129.11         | 11 | <u>1272.66</u> | 1255.66        | <u>1254.66</u> | <u>1244.66</u> | 1227.66       | 1226.66       | 339.24 |

| 2+ # | y             | y*            | y°            | #  | b             | b*            | b°            | a             | a*            | a°            | Pro    |
|------|---------------|---------------|---------------|----|---------------|---------------|---------------|---------------|---------------|---------------|--------|
| S 11 | <u>645.84</u> | <u>637.34</u> | <u>636.84</u> | 1  | 44.52         | 36.02         | 35.52         | 30.53         | 22.03         | 21.53         |        |
| N 10 | <u>602.32</u> | 593.82        | 593.32        | 2  | 101.55        | 93.05         | 92.55         | 87.55         | 79.05         | 78.55         |        |
| Q 9  | <u>545.30</u> | <u>536.80</u> | <u>536.30</u> | 3  | 165.57        | 157.07        | 156.57        | 151.58        | 143.08        | 142.58        |        |
| I 8  | <u>481.27</u> | 472.77        | 472.27        | 4  | <u>222.12</u> | <u>213.62</u> | <u>213.12</u> | <u>208.12</u> | 199.62        | 199.12        |        |
| A 7  | <u>424.73</u> | 416.23        | 415.73        | 5  | <u>257.64</u> | 249.14        | 248.64        | <u>243.64</u> | 235.14        | 234.64        |        |
| E 6  | <u>389.21</u> | 380.71        | 380.21        | 6  | <u>322.16</u> | 313.66        | 313.16        | <u>308.16</u> | 299.66        | 299.16        |        |
| Q 5  | <u>324.69</u> | 316.19        | 315.69        | 7  | <u>386.19</u> | 377.69        | 377.19        | <u>372.19</u> | <u>363.69</u> | <u>363.19</u> |        |
| Y 4  | <u>260.66</u> | 252.16        | 251.66        | 8  | <u>467.72</u> | 459.22        | 458.72        | <u>453.72</u> | <u>445.22</u> | <u>444.72</u> |        |
| P 3  | 179.13        | 170.63        | 170.13        | 9  | <u>516.24</u> | 507.74        | 507.24        | <u>502.25</u> | 493.75        | 493.25        | 49.53  |
| L 2  | 130.60        | 122.10        | 121.60        | 10 | <u>572.79</u> | 564.29        | 563.79        | <u>558.79</u> | 550.29        | 549.79        | 106.08 |
| K 1  | 74.06         | 65.56         | 65.06         | 11 | <u>636.83</u> | <u>628.33</u> | <u>627.83</u> | <u>622.84</u> | 614.34        | 613.84        | 170.12 |



# I. RRC00485 (7003)

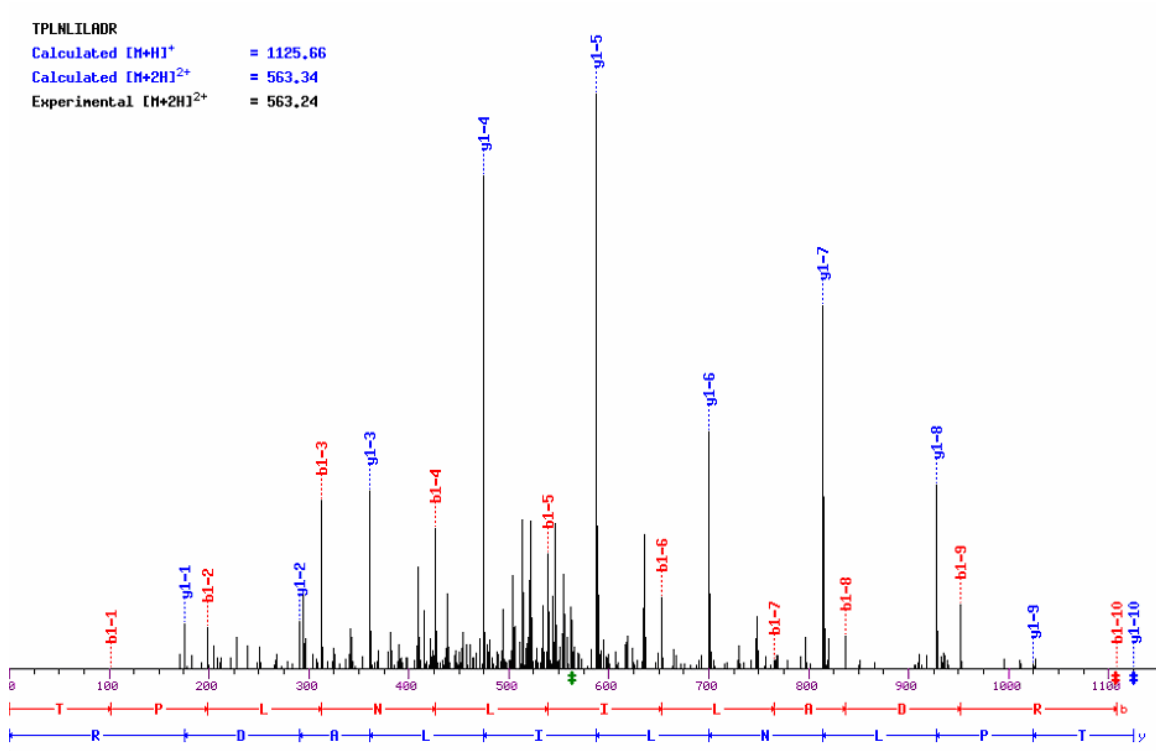

**Header:** rrc00485, OUTER MEMBRANE LIPOPROTEINS CARRIER PROTEIN PRECURSOR S 451709:452317 reverse MW:21974  
**Avg Mass:** 21974.4      **Coverage:** 10/203 = 4.9% by amino acid count, 1125.3/21974.4 = 5.1% by mass

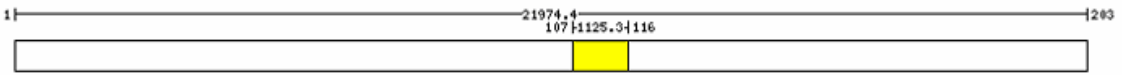

MIQMRFAPVA ALLPVLMLAL AAPAWAEKIP LAQLSAYLNG LTTAEAAFTQ VNADGSKSTG KLYLKRPGRM RFEYSDDDTL VLASGGQVAI  
 FDPKSNQIAE QYPLKRTPLN LILADRIDL A QARMVVGHEA EGANTAVVAQ DPQNPDYGTI RLVFSANPVT LRRWVITDDT GAKTIVILDQ  
 LKPGVDPGPI MFSIVAETEA RKN

**Sort by:**      **Sequence**       **Position**   
 PepStat      TPLNLILADR      107 - 116

TPLNLILADR

Calculated [M+H]<sup>+</sup> 1125.66

Calculated [M+2H]<sup>2+</sup> 563.34

Experimental [M+2H]<sup>2+</sup> 563.24

| 1+ # | y              | y <sup>*</sup> | y <sup>°</sup> | #  | b              | b <sup>*</sup> | b <sup>°</sup> | a              | a <sup>*</sup> | a <sup>°</sup> | Pro           |
|------|----------------|----------------|----------------|----|----------------|----------------|----------------|----------------|----------------|----------------|---------------|
| T 10 | <u>1125.66</u> | 1108.66        | 1107.66        | 1  | 102.06         | 85.06          | 84.06          | 74.06          | 57.06          | 56.06          |               |
| P 9  | <u>1024.62</u> | 1007.62        | 1006.62        | 2  | <u>199.11</u>  | <u>182.11</u>  | <u>181.11</u>  | <u>171.11</u>  | 154.11         | 153.11         | 98.06         |
| L 8  | <u>927.56</u>  | <u>910.56</u>  | <u>909.56</u>  | 3  | <u>312.19</u>  | <u>295.19</u>  | <u>294.19</u>  | <u>284.20</u>  | <u>267.20</u>  | <u>266.20</u>  | <u>211.14</u> |
| N 7  | <u>814.48</u>  | <u>797.48</u>  | <u>796.48</u>  | 4  | <u>426.24</u>  | <u>409.24</u>  | <u>408.24</u>  | <u>398.24</u>  | <u>381.24</u>  | <u>380.24</u>  | <u>325.19</u> |
| L 6  | <u>700.44</u>  | 683.44         | 682.44         | 5  | <u>539.32</u>  | <u>522.32</u>  | <u>521.32</u>  | <u>511.32</u>  | 494.32         | 493.32         | <u>438.27</u> |
| I 5  | <u>587.35</u>  | 570.35         | 569.35         | 6  | <u>652.40</u>  | <u>635.40</u>  | <u>634.40</u>  | <u>624.41</u>  | 607.41         | 606.41         | 551.36        |
| L 4  | <u>474.27</u>  | 457.27         | 456.27         | 7  | <u>765.49</u>  | <u>748.49</u>  | <u>747.49</u>  | <u>737.49</u>  | 720.49         | 719.49         | <u>664.44</u> |
| A 3  | <u>361.18</u>  | 344.18         | <u>343.18</u>  | 8  | <u>836.52</u>  | <u>819.52</u>  | <u>818.52</u>  | <u>808.53</u>  | 791.53         | 790.53         | 735.48        |
| D 2  | <u>290.15</u>  | 273.15         | 272.15         | 9  | <u>951.55</u>  | <u>934.55</u>  | <u>933.55</u>  | <u>923.56</u>  | <u>906.56</u>  | 905.56         | <u>850.50</u> |
| R 1  | <u>175.12</u>  | 158.12         | 157.12         | 10 | <u>1107.65</u> | <u>1090.65</u> | <u>1089.65</u> | <u>1079.66</u> | 1062.66        | 1061.66        | 1006.60       |

| 2+ # | y             | y <sup>*</sup> | y <sup>°</sup> | #  | b             | b <sup>*</sup> | b <sup>°</sup> | a             | a <sup>*</sup> | a <sup>°</sup> | Pro           |
|------|---------------|----------------|----------------|----|---------------|----------------|----------------|---------------|----------------|----------------|---------------|
| T 10 | <u>563.34</u> | <u>554.84</u>  | <u>554.34</u>  | 1  | 51.53         | 43.03          | 42.53          | 37.53         | 29.03          | 28.53          |               |
| P 9  | <u>512.81</u> | <u>504.31</u>  | <u>503.81</u>  | 2  | 100.06        | 91.56          | 91.06          | 86.06         | 77.56          | 77.06          | 49.53         |
| L 8  | <u>464.29</u> | 455.79         | 455.29         | 3  | 156.60        | 148.10         | 147.60         | 142.60        | 134.10         | 133.60         | 106.08        |
| N 7  | <u>407.74</u> | 399.24         | 398.74         | 4  | <u>213.62</u> | <u>205.12</u>  | <u>204.62</u>  | <u>199.62</u> | 191.12         | 190.62         | 163.10        |
| L 6  | <u>350.72</u> | <u>342.22</u>  | <u>341.72</u>  | 5  | <u>270.16</u> | 261.66         | 261.16         | <u>256.17</u> | 247.67         | 247.17         | <u>219.64</u> |
| I 5  | <u>294.18</u> | 285.68         | 285.18         | 6  | <u>326.71</u> | 318.21         | 317.71         | <u>312.71</u> | 304.21         | 303.71         | 276.18        |
| L 4  | <u>237.64</u> | <u>229.14</u>  | <u>228.64</u>  | 7  | <u>383.25</u> | 374.75         | 374.25         | <u>369.25</u> | <u>360.75</u>  | <u>360.25</u>  | 332.72        |
| A 3  | <u>181.10</u> | 172.60         | <u>172.10</u>  | 8  | <u>418.77</u> | <u>410.27</u>  | <u>409.77</u>  | <u>404.77</u> | 396.27         | 395.77         | 368.24        |
| D 2  | 145.58        | 137.08         | 136.58         | 9  | <u>476.28</u> | 467.78         | 467.28         | <u>462.28</u> | 453.78         | 453.28         | <u>425.76</u> |
| R 1  | 88.06         | 79.56          | 79.06          | 10 | <u>554.33</u> | <u>545.83</u>  | <u>545.33</u>  | <u>540.33</u> | 531.83         | 531.33         | <u>503.81</u> |

## SUPPLEMENTAL FIGURE 2.

### A. RRC03108 (2501)

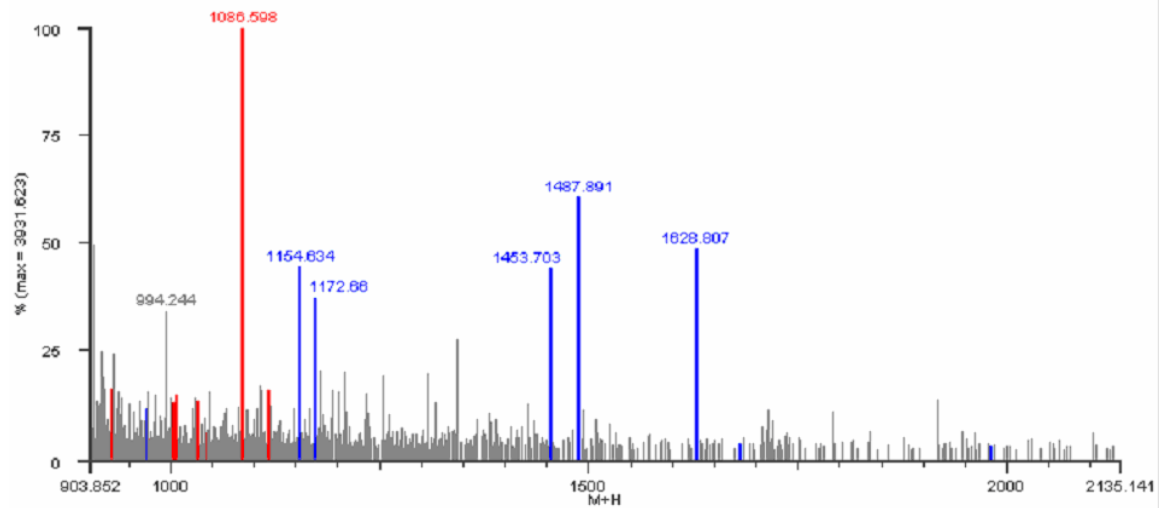

#### RRC03108, Coverage Map

|     |            |            |            |            |            |
|-----|------------|------------|------------|------------|------------|
| 1   | MILRAPFRIL | AAVVLAVLSA | LPAAAIETE  | VTSPGGIKAW | LVEAHDIPFT |
| 51  | ALEIRFRGGA | SLDEPGKRG  | TNLMATLEE  | GSADLDSQGF | AAAEALAAAS |
| 101 | FKFDVDDTL  | SISARMLTEN | RDKAVDLLRG | ALTDPHFDQA | SVDRVRGQVL |
| 151 | SIIASETQDP | QALAGEAFRK | LAYGDHPYGT | SLNGTLDVQ  | ALTREDMFTA |
| 201 | KARVMARDRL | VVSAVGDITA | ADLGPLLDRL | LGDLPATGAP | LPPRADLALT |
| 251 | GGVTVPFDT  | PQATVIFGEQ | GLAMSDPDF  | PAYVFNEILG | AGGFSSRLME |
| 301 | EVREKRGLTY | GIYTYLVPK  | LAETWQGSFA | SANGKVAEAI | EIVKAEWARA |
| 351 | ASGKVDREL  | ADAKTYLTGA | YPLRFDGNGN | IADILAGMQL | NGLPVDYINT |
| 401 | RNDKVTAVTK | DDIARVAQRL | IKAEGLRFVV | VGQPEGLK   |            |

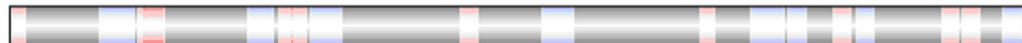

| Submitted Mass | mW       | Delta  | Delta (ppm) | Score  | Start | End | Sequence                |
|----------------|----------|--------|-------------|--------|-------|-----|-------------------------|
| 1003.564       | 1002.58  | 0.024  | 23.733      | -0.512 | 1     | 8   | (-)MILRAPFR(I)          |
| 1981.001       | 1980.047 | 0.054  | 27.194      | -0.1   | 39    | 55  | (K)AWLVEAHDIPFTALEIR(F) |
| 1233.588       | 1232.615 | 0.035  | 28.239      | -0.593 | 56    | 67  | (R)FRGGASLDEPGK(R)      |
| 1086.598       | 1085.547 | -0.043 | -39.796     | -0.18  | 58    | 68  | (R)GGASLDEPGKR(G)       |
| 1453.703       | 1452.673 | -0.022 | -15.27      | 2.975  | 103   | 115 | (K)FDVDDTLSISAR(M)      |
| 1006.487       | 1005.491 | 0.012  | 11.756      | 0.407  | 116   | 123 | (R)MLTENRDK(A)          |
| 929.559        | 928.534  | -0.017 | -18.525     | 0.37   | 122   | 129 | (R)DKAVDLLR(G)          |
| 1628.807       | 1627.759 | -0.04  | -24.688     | 2.059  | 130   | 144 | (R)GALTDPHFDQASVDR(V)   |
| 1068.541       | 1067.507 | -0.026 | -24.538     | -0.616 | 195   | 203 | (R)EDMFTAKAR(V)         |
| 1487.891       | 1486.851 | -0.032 | -21.637     | 2.273  | 230   | 244 | (R)LLGDLPATGAPLPPR(A)   |
| 1033.539       | 1032.527 | -0.004 | -3.991      | -0.05  | 298   | 305 | (R)LMEEVREK(R)          |
| 1681.773       | 1680.774 | 0.009  | 5.278       | -0.443 | 320   | 335 | (K)DLAETWQGSFASANGK(V)  |
| 971.604        | 970.57   | -0.026 | -26.977     | -0.187 | 336   | 344 | (K)VAEAIIVK(A)          |
| 1117.592       | 1116.578 | -0.006 | -5.571      | 0.326  | 355   | 364 | (K)VDRELADAK(T)         |
| 1154.634       | 1153.613 | -0.013 | -11.454     | 3.031  | 365   | 374 | (K)TYLTGAYPLR(F)        |
| 975.586        | 974.54   | -0.018 | -18.633     | -0.607 | 402   | 410 | (R)NDKVTAVTK(D)         |
| 1043.573       | 1042.552 | -0.013 | -12.64      | -0.564 | 411   | 419 | (K)DDIARVAQR(L)         |
| 1172.66        | 1171.66  | 0.008  | 6.645       | 0.559  | 428   | 438 | (R)FWVGQPEGLK(-)        |

## B. RRC03108 (1506)

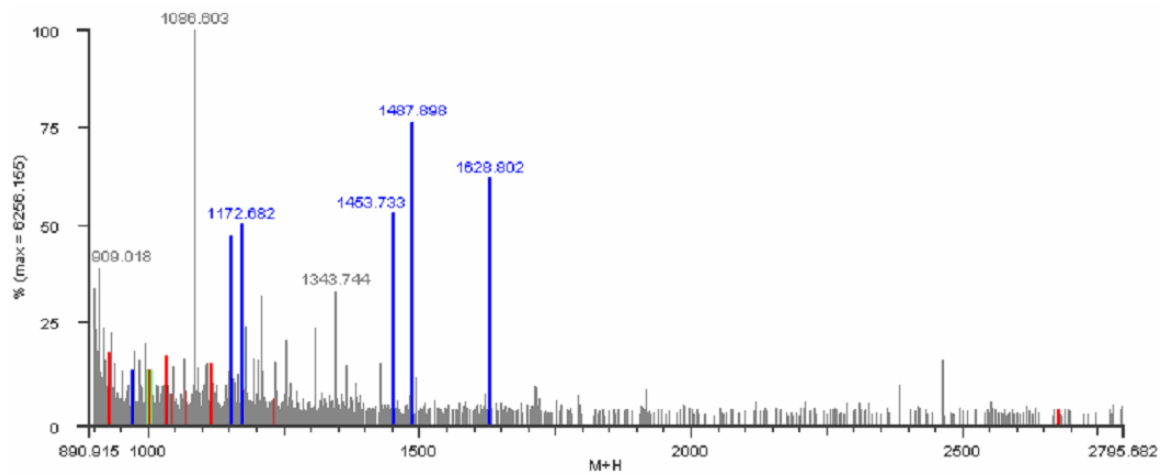

### RRC03108, Coverage Map

|     |            |            |            |            |            |
|-----|------------|------------|------------|------------|------------|
| 1   | MILRAPFRIL | AAVVLAVLSA | LPAAAIETE  | VTSPGGIKAW | LVEAHDIPFT |
| 51  | ALEIRFRGGA | SLDEPGKRG  | TNLMTATLEE | GSADLDSQGF | AAAQEALAAS |
| 101 | FKFDVDDDTL | SISARMLTEN | RDKAVDLLRG | ALTDPHFDQA | SVDRVGRQVL |
| 151 | SIIASETQDP | QALAGEAFRK | LAYGDHPYGT | SLNGTLDSVQ | ALTREDMFTA |
| 201 | KARVMARDRL | VSAVGDITA  | ADLGPLDRL  | LGDLPATGAP | LPPRADLALT |
| 251 | GGVTVPVFDT | PQATVIFGEQ | GLAMSDPFF  | PAYVFNEILG | AGGFSSRLME |
| 301 | EVREKRGLTY | GIYTYLVPKD | LAETWQGSFA | SANGKVAEAI | EIVKAEWARA |
| 351 | ASGKVTDREL | ADAKTYLTGA | YPLRFDGNGN | IADILAGMQL | NGLPVDYINT |
| 401 | RNDKVTAVTK | DDIARVAQRL | IKAEGLRFVV | VGQPEGLK   |            |

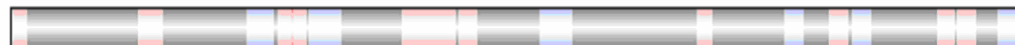

| Submitted Mass | mW       | Delta  | Delta (ppm) | Score  | Start | End | Sequence                        |
|----------------|----------|--------|-------------|--------|-------|-----|---------------------------------|
| 1003.59        | 1002.58  | -0.002 | -2.201      | -0.739 | 1     | 8   | (-)MILRAPFR(I)                  |
| 1233.655       | 1232.615 | -0.032 | -26.13      | -0.895 | 56    | 67  | (R)FRGGASLDEPGK(R)              |
| 1453.733       | 1452.673 | -0.052 | -35.941     | 2.794  | 103   | 115 | (K)FDVDDDTLSISAR(M)             |
| 1006.487       | 1005.491 | 0.012  | 11.756      | 0.049  | 116   | 123 | (R)MLTENRDK(A)                  |
| 929.557        | 928.534  | -0.015 | -16.355     | 0.315  | 122   | 129 | (R)DKAVDLLR(G)                  |
| 1628.802       | 1627.759 | -0.035 | -21.613     | 3.101  | 130   | 144 | (R)GALTDPHFDQASVDR(V)           |
| 2677.465       | 2676.351 | -0.106 | -39.705     | -0.821 | 170   | 194 | (R)KLAYGDHPYGTSLNGTLDSVQALTR(E) |
| 1068.524       | 1067.507 | -0.009 | -8.644      | -0.857 | 195   | 203 | (R)EDMFTAKAR(V)                 |
| 1487.898       | 1486.851 | -0.039 | -26.316     | 3.245  | 230   | 244 | (R)LLGDLPATGAPLPPR(A)           |
| 1033.552       | 1032.527 | -0.017 | -16.64      | 0.004  | 298   | 305 | (R)LMEEVREK(R)                  |
| 971.606        | 970.57   | -0.028 | -29.052     | -0.208 | 336   | 344 | (K)VAEAIEMK(A)                  |
| 1117.616       | 1116.578 | -0.03  | -26.999     | -0.072 | 355   | 364 | (K)VTDRELADAK(T)                |
| 1154.652       | 1153.613 | -0.031 | -27.008     | 2.526  | 365   | 374 | (K)TYLTGAYPLR(F)                |
| 975.553        | 974.54   | -0.005 | -5.293      | -0.89  | 402   | 410 | (R)NDKVTAVTK(D)                 |
| 1043.585       | 1042.552 | -0.025 | -24.114     | -0.824 | 411   | 419 | (K)DDIARVAQRL(L)                |
| 1172.682       | 1171.66  | -0.014 | -12.108     | 1.421  | 428   | 438 | (R)FVWGQPEGLK(-)                |

### C. RRC01299 (208)

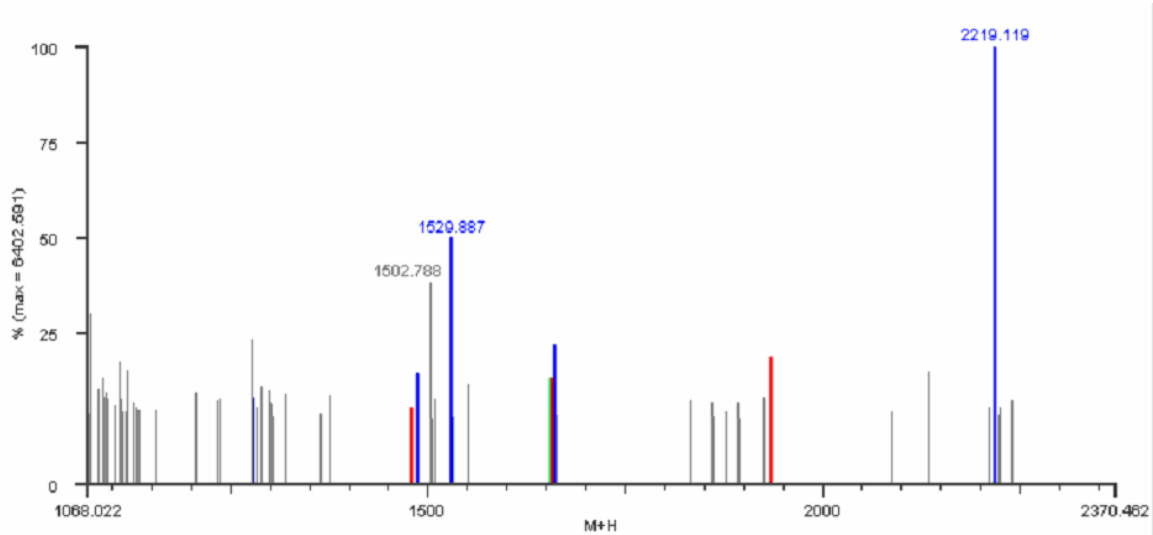

#### RRC01299, Coverage Map

|     |            |            |            |            |            |
|-----|------------|------------|------------|------------|------------|
| 1   | MTKALKRAAL | SALALLAASS | AATAAPDEIT | VAWFLEWPLP | FEQAKVDGTF |
| 51  | EKELGVKVNW | RAFDTGVAMS | AAAAAGDVQF | LISQGVPPFV | TATSAGQDLK |
| 101 | AIAIAVSYSE | NDNCVVRKDL | EITKENAKDL | IGRKVGVPLG | TAAHYGFLKQ |
| 151 | LEHFGLEASQ | LQVVDLTTPD | AAAAIAQGNI | DVFCGWGGAL | ARAKDYGNVL |
| 201 | LTGAEKEEAG | IRVFDVISTP | GAFAAENPDL | VTRFLKVVMQ | ENAAYLADPD |
| 251 | RFIPVLAKDS | GLDEAGTRAQ | LAGFALPTIE | EKLSDKWLGG | GLQAYLKSVQ |
| 301 | DFVVTQNIQ  | AALESYEGAV | DASYLEAASK | L          |            |

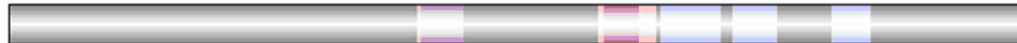

| Submitted Mass | mW       | Delta  | Delta (ppm) | Score  | Start | End | Sequence                    |
|----------------|----------|--------|-------------|--------|-------|-----|-----------------------------|
| 1657.952       | 1656.935 | -0.009 | -5.556      | -0.037 | 134   | 149 | (R)KVGVPPLGTAAHYGFLK(Q)     |
| 1529.887       | 1528.84  | -0.039 | -25.602     | 1.218  | 135   | 149 | (K)VGVPPLGTAAHYGFLK(Q)      |
| 1478.793       | 1477.778 | -0.007 | -4.837      | -0.249 | 193   | 206 | (R)AKDYGNVLLTGAEK(E)        |
| 1279.702       | 1278.646 | -0.048 | -37.7       | 0.038  | 195   | 206 | (K)DYGNVLLTGAEK(E)          |
| 1935           | 1933.974 | -0.018 | -9.4        | 0.798  | 195   | 212 | (K)DYGNVLLTGAEKEEAGIR(V)    |
| 2219.119       | 2218.127 | 0.016  | 7.179       | 3.965  | 213   | 233 | (R)VFDVISTPGAFAAENPDLVTR(F) |
| 1661.818       | 1660.769 | -0.041 | -24.791     | 2.003  | 237   | 251 | (K)VVNDENAAYLADPDR(F)       |
| 1487.848       | 1486.803 | -0.037 | -25.021     | 0.35   | 269   | 282 | (R)AQLAGFALPTIEEK(L)        |

## D. RRC04139 (1004)

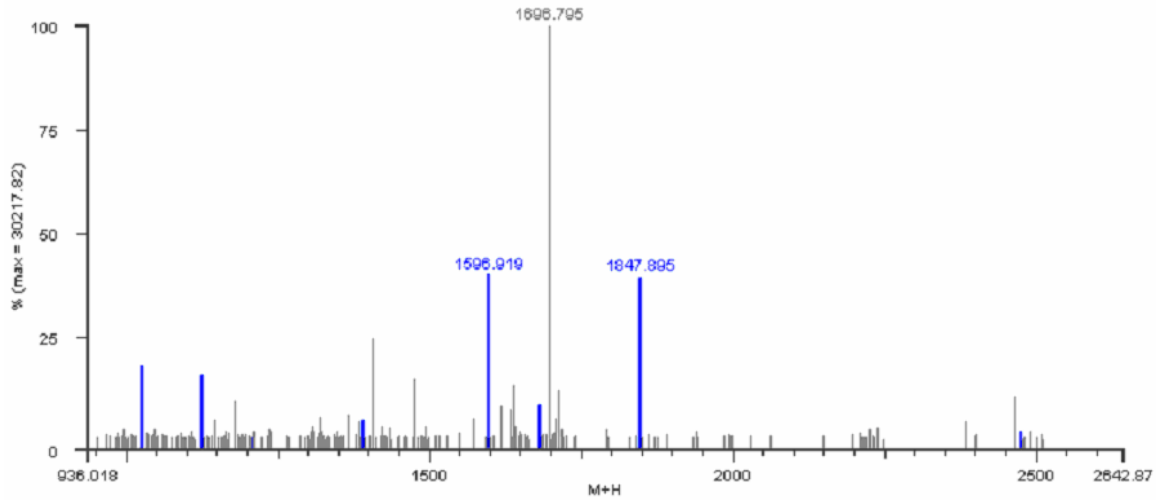

### RRC04139, Coverage Map

```

1      MSVIWACLQR      GSTGYGVRRR      LGKAALAGIF      ALGIGGGAAA      EPVTLLAVGD
51     SLTQGYGLDP      DQGLVPQLQG      WLRTRGAEVT      VINAGVSGDT      TSGGRARLGW
101    SLTPEIDAVM      IALGGNDMLR      GPPPAQARAM      LDAMLSEVTA      RDLPVAVLGL
151    KAPGNYGPDW      QAGYDAIWPE      LGAKYGAVVV      PDLLAPIAAK      TPEARAAEGL
201    MQADNIHPSA      RGVGLVVDAL      GPKVLELLER      VKPAP
  
```

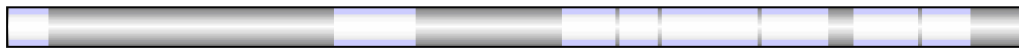

| Submitted Mass | mW       | Delta  | Delta (ppm) | Score  | Start | End | Sequence                      |
|----------------|----------|--------|-------------|--------|-------|-----|-------------------------------|
| 1206.628       | 1205.605 | -0.015 | -12.634     | -0.816 | 1     | 10  | (-)MSVIWACLQR(G)              |
| 1847.895       | 1846.902 | 0.015  | 8.014       | 3.918  | 76    | 95  | (R)GAEVTVINAGVSGDTTSGGR(A)    |
| 1390.697       | 1389.692 | 0.003  | 2.014       | 1.63   | 129   | 141 | (R)ANLDAMLSEVTAR(D)           |
| 1024.678       | 1023.633 | -0.037 | -36.299     | 0.915  | 142   | 151 | (R)DLPVALVGLK(A)              |
| 2476.125       | 2475.149 | 0.032  | 12.856      | -0.904 | 152   | 174 | (K)APGNYGPDWQAGYDAIWPELGAK(Y) |
| 1596.919       | 1595.929 | 0.018  | 11.2        | 2.017  | 175   | 190 | (K)YGAVVVPDLLAPIAAK(T)        |
| 1680.877       | 1679.805 | -0.064 | -38.177     | 0.523  | 196   | 211 | (R)AAEGLMQADNIHPSAR(G)        |
| 1124.678       | 1123.66  | -0.01  | -9.04       | 0.866  | 212   | 223 | (R)GVGLWDALGPK(V)             |

## E. RRC02811 (5002)

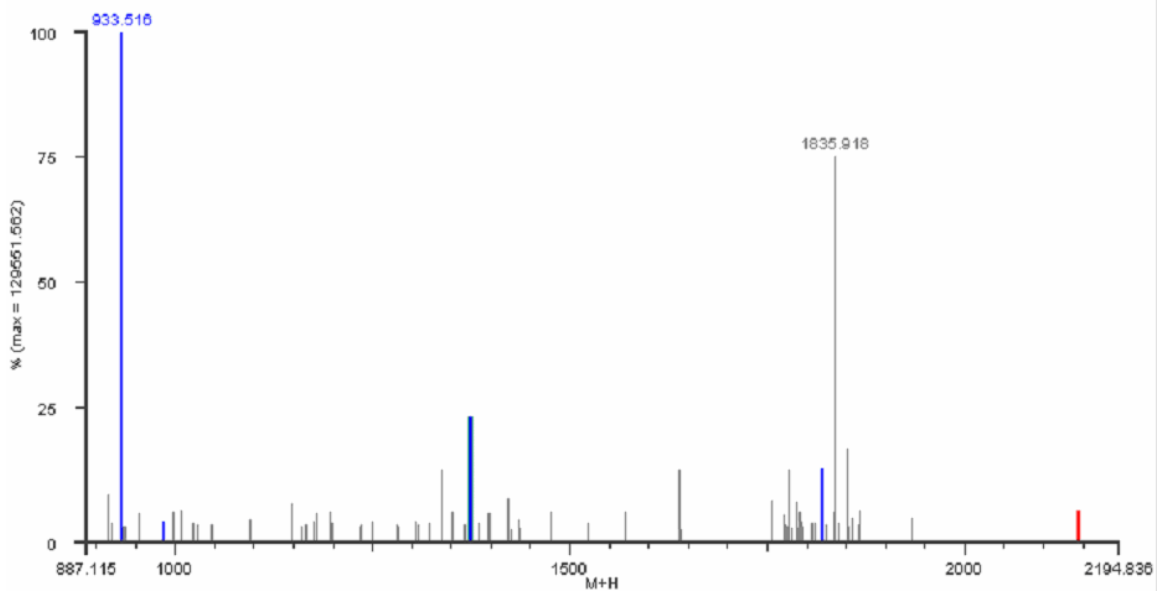

### RRC02811, Coverage Map

```

1      MKLKLMAAAV      LTGFGAFAAP      AARATEAAAP      SFTFASIEGG      VIDTAAAYRGH
51     PVLVVNTASL      CGFTPQLEGL      QALHKAWGPK      GLIVLAVPSD      DFKQELES GK
101    EVSEFCTLTY      GLTVPMDIT      PVLGEGAHPP      FKWLKETQGF      VPRWVFMKVL
151    LDGEGRVVAT      WGSMTKPES      AIRAAFEPLL      PGA
  
```

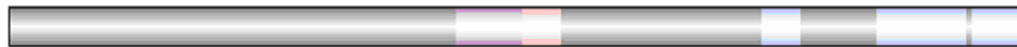

| Submitted Mass | mW       | Delta  | Delta (ppm) | Score  | Start | End | Sequence                    |
|----------------|----------|--------|-------------|--------|-------|-----|-----------------------------|
| 1373.756       | 1372.76  | 0.012  | 8.624       | 2.22   | 81    | 93  | (K)GLIVLAVPSDDFK(Q)         |
| 2145.103       | 2144.136 | 0.041  | 19.026      | -1.382 | 81    | 100 | (K)GLIVLAVPSDDFKQELES GK(E) |
| 933.516        | 932.471  | -0.037 | -39.862     | 5.203  | 136   | 143 | (K)ETQGFVPR(W)              |
| 1819.928       | 1818.93  | 0.01   | 5.411       | 3.267  | 157   | 173 | (R)WATWGSMTKPESAIR(A)       |
| 985.556        | 984.528  | -0.02  | -20.527     | -1.272 | 174   | 183 | (R)AAFEPLLPGA(-)            |

## F. RRC01208 (2602)

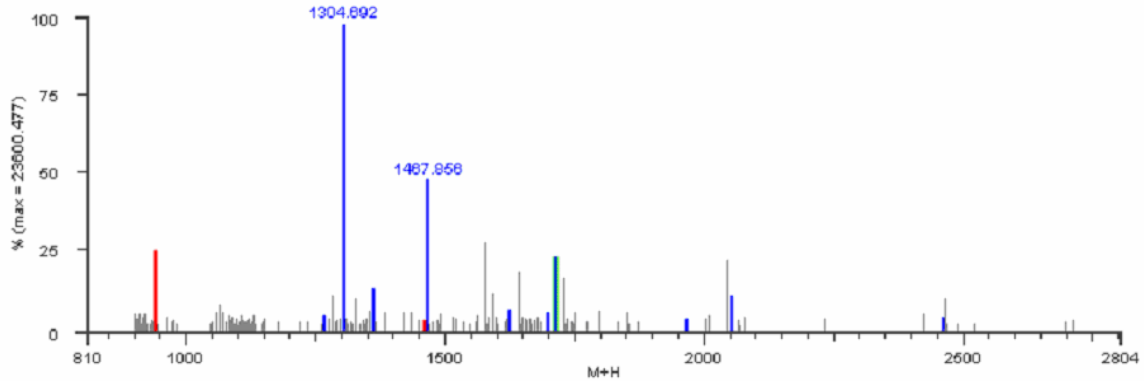

### RRC01208, Coverage Map

|     |            |            |            |            |            |
|-----|------------|------------|------------|------------|------------|
| 1   | MIKTPLPLTT | PRRARPILMA | VLLSTALALS | PLAMTPAQAG | PVPESFADLV |
| 51  | VQVKPAVVM  | TTSTIVSEPA | GRMPGFPPGS | PFEFFKFEFG | MPNMPQGGPQ |
| 101 | RQHRADALGS | GFVISADGYI | VTNMHVIKGE | DGNTVADEIS | IEFANGKKLD |
| 151 | AKIVGTDPKT | DIALLKVESK | EPLPFVSFGD | SDTMREGDWV | MAMGNPLGQG |
| 201 | FSTSVGIVSA | RNRELSGTYG | DYIQTDAAIN | RGNSGGPLFS | MDGKVICWNT |
| 251 | AILSPNGGSI | GIGFSMASNV | VSKVVGQLQE | FGATRRGWLG | VKIQLTPDM  |
| 301 | AEAMSLATPE | GAMVSEVPEG | PAKVAGMKSG | DVIISFAGAP | VKDTKSLTRR |
| 351 | VADAPVGQAV | DVVVVRAGKP | VTLQVTLGQR | ELAESSEAAA | GGTAPALAGG |
| 401 | AVLGMVLSPI | TDAMRAERNL | PEDLTGLMVT | DIDATGAAFD | KGLRAGDVIV |
| 451 | EAGQPVTSL  | DDLKARVAEA | KEGGRKSVLL | LIRREGEPRF | VAVPLQ     |

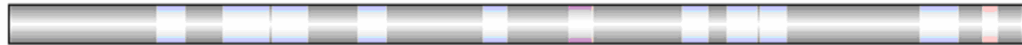

| Submitted Mass | mW       | Delta | Delta (ppm) | Score  | Start | End | Sequence                      |
|----------------|----------|-------|-------------|--------|-------|-----|-------------------------------|
| 1713.763       | 1712.791 | 0.036 | 20.949      | 0.59   | 73    | 87  | (R)MPGFPPGSPFEFFK(E)          |
| 2461.196       | 2460.265 | 0.077 | 31.207      | -1.342 | 105   | 128 | (R)ADALGSGFVISADGYVTNMHVIK(G) |
| 1965.878       | 1964.896 | 0.026 | 13.114      | -1.4   | 129   | 147 | (K)GEDGNTVADEISIEFANGK(K)     |
| 1697.764       | 1696.777 | 0.021 | 12.248      | 0.935  | 171   | 185 | (K)EPLPFVSFGDSDTMR(E)         |
| 1266.562       | 1265.571 | 0.017 | 13.281      | -0.577 | 232   | 244 | (R)GNSGGPLFSMDGK(V)           |
| 1304.892       | 1303.688 | 0.004 | 2.917       | 4.132  | 274   | 285 | (K)WGQLQEFGATR(R)             |
| 1460.778       | 1459.79  | 0.022 | 14.947      | -1.706 | 274   | 286 | (K)WGQLQEFGATRR(G)            |
| 1360.736       | 1359.74  | 0.012 | 8.721       | 0.397  | 329   | 342 | (K)SGDVIISFAGAPVK(D)          |
| 1625.854       | 1624.861 | 0.015 | 9.118       | 1.263  | 351   | 366 | (R)VADAPVGQAVDVVVR(A)         |
| 1487.856       | 1486.857 | 0.009 | 6.042       | 3.689  | 367   | 380 | (R)AGKPVTLQVTLGQR(E)          |
| 2055.024       | 2054.053 | 0.037 | 17.962      | -0.094 | 445   | 464 | (R)AGDVIVEAGQPVTSLDDLK(A)     |
| 941.646        | 940.643  | 0.005 | 5.128       | 2.182  | 476   | 483 | (R)KSVLLLR(R)                 |
